# Supplementary material
Source: publisher figshare collection journal article supplement (https://acs.figshare.com/ndownloader/files/5716095)
Supplement: Supplementary file 1 [file 5716095]

```

VIB (V=0)  8      .112791D+01      .052275      .120367
VIB (V=0)  9      .110787D+01      .044490      .102443
VIB (V=0) 10      .109089D+01      .037783      .086998
VIB (V=0) 11      .107553D+01      .031622      .072811
VIB (V=0) 12      .107087D+01      .029736      .068470
VIB (V=0) 13      .105414D+01      .022899      .052727
ELECTRONIC      .100000D+01      .000000      .000000
TRANSLATIONAL    .589838D+08      7.770733      17.892773
ROTATIONAL       .298632D+06      5.475137      12.606969
***** Axes restored to original set *****

```

| Center<br>Number | Atomic<br>Number | Forces (Hartrees/Bohr) |             |             |
|------------------|------------------|------------------------|-------------|-------------|
|                  |                  | X                      | Y           | Z           |
| 1                | 6                | .0000000000            | .0000000000 | -.000017302 |
| 2                | 7                | .0000000000            | .0000000000 | .000142076  |
| 3                | 6                | .0000000000            | .0000000000 | -.000260818 |
| 4                | 6                | -.000177411            | .0000000000 | .000099478  |
| 5                | 6                | .000060648             | .0000000000 | .000020378  |
| 6                | 6                | .000177411             | .0000000000 | .000099478  |
| 7                | 6                | -.000060648            | .0000000000 | .000020378  |
| 8                | 6                | .000130343             | .0000000000 | -.000046285 |
| 9                | 6                | -.000130343            | .0000000000 | -.000046285 |
| 10               | 6                | .0000000000            | .0000000000 | -.000072739 |
| 11               | 1                | -.000045658            | .0000000000 | -.000022144 |
| 12               | 1                | .000045658             | .0000000000 | -.000022144 |
| 13               | 1                | -.000003714            | .0000000000 | .000045496  |
| 14               | 1                | -.000004298            | .000007986  | -.000007196 |
| 15               | 1                | -.000004298            | -.000007986 | -.000007196 |
| 16               | 1                | .000003714             | .0000000000 | .000045496  |
| 17               | 1                | .000004298             | -.000007986 | -.000007196 |
| 18               | 1                | .000004298             | .000007986  | -.000007196 |
| 19               | 1                | .0000000000            | .0000000000 | .000043720  |

```

Cartesian Forces: Max      .000260818 RMS      .000064176
Internal Forces:  Max      .000138621 RMS      .000026162

```

GradGradGradGradGradGradGradGradGradGradGradGradGradGradGradGradGradGradGradGradGradGrad  
Berny optimization.

Search for a local minimum.

Step number 1 out of a maximum of 114

All quantities printed in internal units (Hartrees-Bohrs-Radians)

Second derivative matrix not updated -- analytic derivatives used.

```

Eigenvalues ---  -.00051  -.00021  .00199  .01195  .01251
Eigenvalues ---   .01509  .01521  .01652  .01848  .01942
Eigenvalues ---   .02118  .02291  .02315  .02545  .03554
Eigenvalues ---   .03762  .04526  .05358  .05444  .08606
Eigenvalues ---   .08615  .09944  .10058  .10117  .10264
Eigenvalues ---   .10862  .12106  .12297  .17659  .17802
Eigenvalues ---   .18453  .18606  .22873  .23716  .27950
Eigenvalues ---   .27990  .29392  .31447  .31455  .31858
Eigenvalues ---   .32279  .32690  .33813  .33964  .34228
Eigenvalues ---   .35496  .36767  .42036  .42978  .46360
Eigenvalues ---   .998721000.000001000.000001000.000001000.00000
Eigenvalues ---  1000.000001000.000001000.000001000.000001000.00000
Eigenvalues ---  1000.000001000.000001000.000001000.000001000.00000
Eigenvalues ---  1000.000001000.000001000.000001000.000001000.00000

```

Eigenvalues --- 1000.000001000.000001000.000001000.000001000.00000  
Eigenvalue 1 out of range, new value = .000513 Eigenvector:

1  
R1 .00000  
R2 .00000  
R3 .00000  
R4 .00000  
R5 .00000  
R6 .00000  
R7 .00000  
R8 .00000  
R9 .00000  
R10 .00000  
R11 .00000  
R12 .00000  
R13 .00000  
R14 .00000  
R15 .00213  
R16 -.00213  
R17 .00000  
R18 .00000  
R19 .00213  
R20 -.00213  
R21 .00000  
A1 .00000  
A2 .00000  
A3 .00000  
A4 .00000  
A5 .00000  
A6 .00000  
A7 .00000  
A8 .00000  
A9 .00000  
A10 .00000  
A11 .00000  
A12 .00000  
A13 .00000  
A14 .00000  
A15 .00000  
A16 .00000  
A17 .00000  
A18 .00000  
A19 .00000  
A20 .00000  
A21 .00101  
A22 -.00687  
A23 -.00101  
A24 .00687  
A25 .00000  
A26 .00000

|     |         |
|-----|---------|
| A27 | .00000  |
| A28 | .00000  |
| A29 | .00000  |
| A30 | .00000  |
| A31 | .00101  |
| A32 | -.00687 |
| A33 | -.00101 |
| A34 | .00687  |
| A35 | .00000  |
| A36 | .00000  |
| A37 | .00000  |
| D1  | -.07313 |
| D2  | -.07313 |
| D3  | -.07313 |
| D4  | -.07313 |
| D5  | -.00153 |
| D6  | -.00153 |
| D7  | -.01357 |
| D8  | -.01357 |
| D9  | .00312  |
| D10 | .01486  |
| D11 | .00230  |
| D12 | .01404  |
| D13 | -.00153 |
| D14 | -.00153 |
| D15 | -.01357 |
| D16 | -.01357 |
| D17 | .00312  |
| D18 | .01486  |
| D19 | .00230  |
| D20 | .01404  |
| D21 | .20653  |
| D22 | .19419  |
| D23 | .21462  |
| D24 | .20227  |
| D25 | .21462  |
| D26 | .20227  |
| D27 | .20653  |
| D28 | .19419  |
| D29 | .21462  |
| D30 | .20227  |
| D31 | .21462  |
| D32 | .20227  |
| D33 | -.00163 |
| D34 | -.00080 |
| D35 | -.00163 |
| D36 | -.00080 |
| D37 | -.00163 |
| D38 | -.00080 |
| D39 | -.00163 |
| D40 | -.00080 |
| D41 | .19208  |
| D42 | .19208  |
| D43 | .19208  |
| D44 | -.20047 |
| D45 | -.20396 |
| D46 | -.20396 |

|     |         |
|-----|---------|
| D47 | .19208  |
| D48 | .19208  |
| D49 | .19208  |
| D50 | -.20047 |
| D51 | -.20396 |
| D52 | -.20396 |

Eigenvalue 2 out of range, new value = .000208 Eigenvector:

|     |         |
|-----|---------|
|     | 1       |
| R1  | .00000  |
| R2  | .00000  |
| R3  | .00000  |
| R4  | .00000  |
| R5  | .00000  |
| R6  | .00000  |
| R7  | .00000  |
| R8  | .00000  |
| R9  | .00000  |
| R10 | .00000  |
| R11 | .00000  |
| R12 | .00000  |
| R13 | .00000  |
| R14 | .00000  |
| R15 | .00155  |
| R16 | -.00155 |
| R17 | .00000  |
| R18 | .00000  |
| R19 | -.00155 |
| R20 | .00155  |
| R21 | .00000  |
| A1  | .00000  |
| A2  | .00000  |
| A3  | .00000  |
| A4  | .00000  |
| A5  | .00000  |
| A6  | .00000  |
| A7  | .00000  |
| A8  | .00000  |
| A9  | .00000  |
| A10 | .00000  |
| A11 | .00000  |
| A12 | .00000  |
| A13 | .00000  |
| A14 | .00000  |
| A15 | .00000  |
| A16 | .00000  |
| A17 | .00000  |
| A18 | .00000  |
| A19 | .00000  |
| A20 | .00000  |
| A21 | -.00082 |
| A22 | -.00565 |
| A23 | .00082  |
| A24 | .00565  |
| A25 | .00000  |
| A26 | .00000  |
| A27 | .00000  |
| A28 | .00000  |

|     |         |
|-----|---------|
| A29 | .00000  |
| A30 | .00000  |
| A31 | .00082  |
| A32 | .00565  |
| A33 | -.00082 |
| A34 | -.00565 |
| A35 | .00000  |
| A36 | .00000  |
| A37 | .00000  |
| D1  | -.04212 |
| D2  | .04354  |
| D3  | -.04354 |
| D4  | .04212  |
| D5  | -.00753 |
| D6  | -.00606 |
| D7  | -.01974 |
| D8  | -.01827 |
| D9  | .00205  |
| D10 | .01395  |
| D11 | .00297  |
| D12 | .01487  |
| D13 | .00753  |
| D14 | .00606  |
| D15 | .01974  |
| D16 | .01827  |
| D17 | -.00205 |
| D18 | -.01395 |
| D19 | -.00297 |
| D20 | -.01487 |
| D21 | .14460  |
| D22 | .13209  |
| D23 | .15241  |
| D24 | .13990  |
| D25 | .15241  |
| D26 | .13990  |
| D27 | -.14460 |
| D28 | -.13209 |
| D29 | -.15241 |
| D30 | -.13990 |
| D31 | -.15241 |
| D32 | -.13990 |
| D33 | .00174  |
| D34 | .00081  |
| D35 | .00248  |
| D36 | .00155  |
| D37 | -.00174 |
| D38 | -.00081 |
| D39 | -.00248 |
| D40 | -.00155 |
| D41 | .12586  |
| D42 | .12489  |
| D43 | .53110  |
| D44 | -.13517 |
| D45 | -.14012 |
| D46 | -.14012 |
| D47 | -.12586 |
| D48 | -.12489 |

D49           -.53110  
 D50           .13517  
 D51           .14012  
 D52           .14012

Angle between quadratic step and forces= 41.28 degrees.

Linear search not attempted -- first point.

Iteration 1 RMS(Cart)= .00022479 RMS(Int)= .00000003

Iteration 2 RMS(Cart)= .00000004 RMS(Int)= .00000001

TrRot= .000000 .000000 .000000 .000000 .000000 .000000

| Variable | Old X   | -DE/DX  | Delta X<br>(Linear) | Delta X<br>(Quad) | Delta X<br>(Total) | New X   |
|----------|---------|---------|---------------------|-------------------|--------------------|---------|
| R1       | 2.25091 | .00002  | .00000              | .00003            | .00003             | 2.25094 |
| R2       | 2.64281 | -.00014 | .00000              | -.00049           | -.00049            | 2.64231 |
| R3       | 2.69260 | -.00001 | .00000              | .00006            | .00006             | 2.69265 |
| R4       | 2.66338 | -.00002 | .00000              | -.00007           | -.00007            | 2.66331 |
| R5       | 2.69260 | -.00001 | .00000              | .00006            | .00006             | 2.69265 |
| R6       | 2.66338 | -.00002 | .00000              | -.00007           | -.00007            | 2.66331 |
| R7       | 2.87284 | .00009  | .00000              | .00049            | .00049             | 2.87333 |
| R8       | 2.87284 | .00009  | .00000              | .00049            | .00049             | 2.87333 |
| R9       | 2.65484 | -.00003 | .00000              | -.00006           | -.00006            | 2.65478 |
| R10      | 2.65484 | -.00003 | .00000              | -.00006           | -.00006            | 2.65478 |
| R11      | 2.06935 | -.00005 | .00000              | -.00016           | -.00016            | 2.06920 |
| R12      | 2.06935 | -.00005 | .00000              | -.00016           | -.00016            | 2.06920 |
| R13      | 4.67834 | .00002  | .00000              | .00085            | .00085             | 4.67920 |
| R14      | 2.07627 | -.00004 | .00000              | -.00012           | -.00012            | 2.07615 |
| R15      | 2.08766 | -.00001 | .00000              | -.00005           | -.00005            | 2.08760 |
| R16      | 2.08766 | -.00001 | .00000              | -.00005           | -.00005            | 2.08760 |
| R17      | 4.67834 | .00002  | .00000              | .00085            | .00085             | 4.67920 |
| R18      | 2.07627 | -.00004 | .00000              | -.00012           | -.00012            | 2.07615 |
| R19      | 2.08766 | -.00001 | .00000              | -.00005           | -.00005            | 2.08760 |
| R20      | 2.08766 | -.00001 | .00000              | -.00005           | -.00005            | 2.08760 |
| R21      | 2.06766 | .00004  | .00000              | .00013            | .00013             | 2.06779 |
| A1       | 2.07315 | .00004  | .00000              | .00028            | .00028             | 2.07343 |
| A2       | 2.05041 | .00005  | .00000              | .00036            | .00036             | 2.05077 |
| A3       | 2.07315 | .00004  | .00000              | .00028            | .00028             | 2.07343 |
| A4       | 2.13689 | -.00008 | .00000              | -.00056           | -.00056            | 2.13633 |
| A5       | 2.05041 | .00005  | .00000              | .00036            | .00036             | 2.05077 |
| A6       | 2.13736 | -.00002 | .00000              | .00001            | .00001             | 2.13737 |
| A7       | 2.09542 | -.00003 | .00000              | -.00037           | -.00037            | 2.09505 |
| A8       | 2.13736 | -.00002 | .00000              | .00001            | .00001             | 2.13737 |
| A9       | 2.09542 | -.00003 | .00000              | -.00037           | -.00037            | 2.09505 |
| A10      | 2.11697 | -.00001 | .00000              | -.00004           | -.00004            | 2.11693 |
| A11      | 2.11697 | -.00001 | .00000              | -.00004           | -.00004            | 2.11693 |
| A12      | 2.09472 | -.00001 | .00000              | -.00007           | -.00007            | 2.09465 |
| A13      | 2.07376 | .00001  | .00000              | .00002            | .00002             | 2.07378 |
| A14      | 2.09245 | .00000  | .00000              | .00003            | .00003             | 2.09248 |
| A15      | 2.07376 | .00001  | .00000              | .00002            | .00002             | 2.07378 |
| A16      | 2.09245 | .00000  | .00000              | .00003            | .00003             | 2.09248 |
| A17      | 1.67644 | .00000  | .00000              | .00015            | .00015             | 1.67658 |
| A18      | 1.46516 | .00000  | .00000              | -.00015           | -.00015            | 1.46501 |
| A19      | 1.96350 | -.00004 | .00000              | -.00017           | -.00017            | 1.96333 |
| A20      | 1.78562 | .00002  | .00000              | .00003            | .00003             | 1.78564 |
| A21      | 1.93164 | .00001  | .00000              | .00000            | .00000             | 1.93164 |
| A22      | 1.88257 | .00001  | .00000              | .00003            | .00003             | 1.88260 |
| A23      | 1.93164 | .00001  | .00000              | .00000            | .00000             | 1.93164 |
| A24      | 1.88257 | .00001  | .00000              | .00003            | .00003             | 1.88260 |
| A25      | 1.86838 | .00000  | .00000              | .00012            | .00012             | 1.86850 |

|     |          |         |        |         |         |          |
|-----|----------|---------|--------|---------|---------|----------|
| A26 | 1.67644  | .00000  | .00000 | .00015  | .00015  | 1.67658  |
| A27 | 1.46516  | .00000  | .00000 | -.00015 | -.00015 | 1.46501  |
| A28 | 2.93031  | .00000  | .00000 | -.00030 | -.00030 | 2.93002  |
| A29 | 1.96350  | -.00004 | .00000 | -.00017 | -.00017 | 1.96333  |
| A30 | 1.78562  | .00002  | .00000 | .00003  | .00003  | 1.78564  |
| A31 | 1.93164  | .00001  | .00000 | .00000  | .00000  | 1.93164  |
| A32 | 1.88257  | .00001  | .00000 | .00003  | .00003  | 1.88260  |
| A33 | 1.93164  | .00001  | .00000 | .00000  | .00000  | 1.93164  |
| A34 | 1.88257  | .00001  | .00000 | .00003  | .00003  | 1.88260  |
| A35 | 1.86838  | .00000  | .00000 | .00012  | .00012  | 1.86850  |
| A36 | 2.09423  | .00000  | .00000 | .00004  | .00004  | 2.09427  |
| A37 | 2.09423  | .00000  | .00000 | .00004  | .00004  | 2.09427  |
| D1  | .00000   | .00000  | .00000 | .00000  | .00000  | .00000   |
| D2  | 3.14159  | .00000  | .00000 | .00000  | .00000  | 3.14159  |
| D3  | 3.14159  | .00000  | .00000 | .00000  | .00000  | 3.14159  |
| D4  | .00000   | .00000  | .00000 | .00000  | .00000  | .00000   |
| D5  | 3.14159  | .00000  | .00000 | .00000  | .00000  | 3.14159  |
| D6  | .00000   | .00000  | .00000 | .00000  | .00000  | .00000   |
| D7  | .00000   | .00000  | .00000 | .00000  | .00000  | .00000   |
| D8  | 3.14159  | .00000  | .00000 | .00000  | .00000  | 3.14159  |
| D9  | .00000   | .00000  | .00000 | .00000  | .00000  | .00000   |
| D10 | 3.14159  | .00000  | .00000 | .00000  | .00000  | 3.14159  |
| D11 | 3.14159  | .00000  | .00000 | .00000  | .00000  | 3.14159  |
| D12 | .00000   | .00000  | .00000 | .00000  | .00000  | .00000   |
| D13 | 3.14159  | .00000  | .00000 | .00000  | .00000  | 3.14159  |
| D14 | .00000   | .00000  | .00000 | .00000  | .00000  | .00000   |
| D15 | .00000   | .00000  | .00000 | .00000  | .00000  | .00000   |
| D16 | 3.14159  | .00000  | .00000 | .00000  | .00000  | 3.14159  |
| D17 | .00000   | .00000  | .00000 | .00000  | .00000  | .00000   |
| D18 | 3.14159  | .00000  | .00000 | .00000  | .00000  | 3.14159  |
| D19 | 3.14159  | .00000  | .00000 | .00000  | .00000  | 3.14159  |
| D20 | .00000   | .00000  | .00000 | .00000  | .00000  | .00000   |
| D21 | .00000   | .00000  | .00000 | .00000  | .00000  | .00000   |
| D22 | 3.14159  | .00000  | .00000 | .00000  | .00000  | 3.14159  |
| D23 | -2.10736 | .00001  | .00000 | .00007  | .00007  | -2.10729 |
| D24 | 1.03423  | .00001  | .00000 | .00007  | .00007  | 1.03430  |
| D25 | 2.10736  | -.00001 | .00000 | -.00007 | -.00007 | 2.10729  |
| D26 | -1.03423 | -.00001 | .00000 | -.00007 | -.00007 | -1.03430 |
| D27 | .00000   | .00000  | .00000 | .00000  | .00000  | .00000   |
| D28 | 3.14159  | .00000  | .00000 | .00000  | .00000  | 3.14159  |
| D29 | -2.10736 | .00001  | .00000 | .00007  | .00007  | -2.10729 |
| D30 | 1.03423  | .00001  | .00000 | .00007  | .00007  | 1.03430  |
| D31 | 2.10736  | -.00001 | .00000 | -.00007 | -.00007 | 2.10729  |
| D32 | -1.03423 | -.00001 | .00000 | -.00007 | -.00007 | -1.03430 |
| D33 | .00000   | .00000  | .00000 | .00000  | .00000  | .00000   |
| D34 | 3.14159  | .00000  | .00000 | .00000  | .00000  | 3.14159  |
| D35 | 3.14159  | .00000  | .00000 | .00000  | .00000  | 3.14159  |
| D36 | .00000   | .00000  | .00000 | .00000  | .00000  | .00000   |
| D37 | .00000   | .00000  | .00000 | .00000  | .00000  | .00000   |
| D38 | 3.14159  | .00000  | .00000 | .00000  | .00000  | 3.14159  |
| D39 | 3.14159  | .00000  | .00000 | .00000  | .00000  | 3.14159  |
| D40 | .00000   | .00000  | .00000 | .00000  | .00000  | .00000   |
| D41 | 3.14159  | .00000  | .00000 | .00000  | .00000  | 3.14159  |
| D42 | .00000   | .00000  | .00000 | .00000  | .00000  | .00000   |
| D43 | .00000   | .00000  | .00000 | .00000  | .00000  | .00000   |
| D44 | .00000   | .00000  | .00000 | .00000  | .00000  | .00000   |
| D45 | 2.13531  | .00000  | .00000 | -.00009 | -.00009 | 2.13523  |

|     |          |        |        |         |         |          |
|-----|----------|--------|--------|---------|---------|----------|
| D46 | -2.13531 | .00000 | .00000 | .00009  | .00009  | -2.13523 |
| D47 | 3.14159  | .00000 | .00000 | .00000  | .00000  | 3.14159  |
| D48 | .00000   | .00000 | .00000 | .00000  | .00000  | .00000   |
| D49 | .00000   | .00000 | .00000 | .00000  | .00000  | .00000   |
| D50 | .00000   | .00000 | .00000 | .00000  | .00000  | .00000   |
| D51 | 2.13531  | .00000 | .00000 | -.00009 | -.00009 | 2.13523  |
| D52 | -2.13531 | .00000 | .00000 | .00009  | .00009  | -2.13523 |

  

| Item                 | Value   | Threshold | Converged? |
|----------------------|---------|-----------|------------|
| Maximum Force        | .000139 | .000450   | YES        |
| RMS Force            | .000026 | .000300   | YES        |
| Maximum Displacement | .000860 | .001800   | YES        |
| RMS Displacement     | .000225 | .001200   | YES        |

Predicted change in Energy=-1.973279D-07

Optimization completed.

-- Stationary point found.

-----  
 ! Optimized Parameters !  
 ! (Angstroms and Degrees) !  
 -----

| ! Name | Definition | Value    | Derivative Info. | ! |
|--------|------------|----------|------------------|---|
| ! R1   | R(2,1)     | 1.1911   | -DE/DX = 0.      | ! |
| ! R2   | R(3,2)     | 1.3985   | -DE/DX = -0.0001 | ! |
| ! R3   | R(4,3)     | 1.4249   | -DE/DX = 0.      | ! |
| ! R4   | R(5,4)     | 1.4094   | -DE/DX = 0.      | ! |
| ! R5   | R(6,3)     | 1.4249   | -DE/DX = 0.      | ! |
| ! R6   | R(7,6)     | 1.4094   | -DE/DX = 0.      | ! |
| ! R7   | R(8,4)     | 1.5202   | -DE/DX = 0.0001  | ! |
| ! R8   | R(9,6)     | 1.5202   | -DE/DX = 0.0001  | ! |
| ! R9   | R(10,5)    | 1.4049   | -DE/DX = 0.      | ! |
| ! R10  | R(10,7)    | 1.4049   | -DE/DX = 0.      | ! |
| ! R11  | R(11,5)    | 1.0951   | -DE/DX = -0.0001 | ! |
| ! R12  | R(12,7)    | 1.0951   | -DE/DX = -0.0001 | ! |
| ! R13  | R(13,2)    | 2.4757   | -DE/DX = 0.      | ! |
| ! R14  | R(13,8)    | 1.0987   | -DE/DX = 0.      | ! |
| ! R15  | R(14,8)    | 1.1047   | -DE/DX = 0.      | ! |
| ! R16  | R(15,8)    | 1.1047   | -DE/DX = 0.      | ! |
| ! R17  | R(16,2)    | 2.4757   | -DE/DX = 0.      | ! |
| ! R18  | R(16,9)    | 1.0987   | -DE/DX = 0.      | ! |
| ! R19  | R(17,9)    | 1.1047   | -DE/DX = 0.      | ! |
| ! R20  | R(18,9)    | 1.1047   | -DE/DX = 0.      | ! |
| ! R21  | R(19,10)   | 1.0942   | -DE/DX = 0.      | ! |
| ! A1   | A(2,3,4)   | 118.7825 | -DE/DX = 0.      | ! |
| ! A2   | A(3,4,5)   | 117.4796 | -DE/DX = 0.0001  | ! |
| ! A3   | A(2,3,6)   | 118.7825 | -DE/DX = 0.      | ! |
| ! A4   | A(4,3,6)   | 122.435  | -DE/DX = -0.0001 | ! |
| ! A5   | A(3,6,7)   | 117.4796 | -DE/DX = 0.0001  | ! |
| ! A6   | A(3,4,8)   | 122.4619 | -DE/DX = 0.      | ! |
| ! A7   | A(5,4,8)   | 120.0584 | -DE/DX = 0.      | ! |
| ! A8   | A(3,6,9)   | 122.4619 | -DE/DX = 0.      | ! |
| ! A9   | A(7,6,9)   | 120.0584 | -DE/DX = 0.      | ! |
| ! A10  | A(4,5,10)  | 121.2935 | -DE/DX = 0.      | ! |
| ! A11  | A(6,7,10)  | 121.2935 | -DE/DX = 0.      | ! |
| ! A12  | A(5,10,7)  | 120.0187 | -DE/DX = 0.      | ! |
| ! A13  | A(4,5,11)  | 118.8178 | -DE/DX = 0.      | ! |
| ! A14  | A(10,5,11) | 119.8887 | -DE/DX = 0.      | ! |
| ! A15  | A(6,7,12)  | 118.8178 | -DE/DX = 0.      | ! |

|       |              |           |          |    |   |
|-------|--------------|-----------|----------|----|---|
| ! A16 | A(10,7,12)   | 119.8887  | -DE/DX = | 0. | ! |
| ! A17 | A(1,2,13)    | 96.0527   | -DE/DX = | 0. | ! |
| ! A18 | A(3,2,13)    | 83.9473   | -DE/DX = | 0. | ! |
| ! A19 | A(4,8,13)    | 112.5     | -DE/DX = | 0. | ! |
| ! A20 | A(2,13,8)    | 102.3083  | -DE/DX = | 0. | ! |
| ! A21 | A(4,8,14)    | 110.6748  | -DE/DX = | 0. | ! |
| ! A22 | A(13,8,14)   | 107.8635  | -DE/DX = | 0. | ! |
| ! A23 | A(4,8,15)    | 110.6748  | -DE/DX = | 0. | ! |
| ! A24 | A(13,8,15)   | 107.8635  | -DE/DX = | 0. | ! |
| ! A25 | A(14,8,15)   | 107.0503  | -DE/DX = | 0. | ! |
| ! A26 | A(1,2,16)    | 96.0527   | -DE/DX = | 0. | ! |
| ! A27 | A(3,2,16)    | 83.9473   | -DE/DX = | 0. | ! |
| ! A28 | A(13,2,16)   | 167.8946  | -DE/DX = | 0. | ! |
| ! A29 | A(6,9,16)    | 112.5     | -DE/DX = | 0. | ! |
| ! A30 | A(2,16,9)    | 102.3083  | -DE/DX = | 0. | ! |
| ! A31 | A(6,9,17)    | 110.6748  | -DE/DX = | 0. | ! |
| ! A32 | A(16,9,17)   | 107.8635  | -DE/DX = | 0. | ! |
| ! A33 | A(6,9,18)    | 110.6748  | -DE/DX = | 0. | ! |
| ! A34 | A(16,9,18)   | 107.8635  | -DE/DX = | 0. | ! |
| ! A35 | A(17,9,18)   | 107.0503  | -DE/DX = | 0. | ! |
| ! A36 | A(5,10,19)   | 119.9906  | -DE/DX = | 0. | ! |
| ! A37 | A(7,10,19)   | 119.9906  | -DE/DX = | 0. | ! |
| ! D1  | D(4,3,2,13)  | 0.        | -DE/DX = | 0. | ! |
| ! D2  | D(4,3,2,16)  | 180.      | -DE/DX = | 0. | ! |
| ! D3  | D(6,3,2,13)  | 180.      | -DE/DX = | 0. | ! |
| ! D4  | D(6,3,2,16)  | 0.        | -DE/DX = | 0. | ! |
| ! D5  | D(5,4,3,2)   | 180.      | -DE/DX = | 0. | ! |
| ! D6  | D(5,4,3,6)   | 0.        | -DE/DX = | 0. | ! |
| ! D7  | D(8,4,3,2)   | 0.        | -DE/DX = | 0. | ! |
| ! D8  | D(8,4,3,6)   | 180.      | -DE/DX = | 0. | ! |
| ! D9  | D(10,5,4,3)  | 0.        | -DE/DX = | 0. | ! |
| ! D10 | D(10,5,4,8)  | 180.      | -DE/DX = | 0. | ! |
| ! D11 | D(11,5,4,3)  | 180.      | -DE/DX = | 0. | ! |
| ! D12 | D(11,5,4,8)  | 0.        | -DE/DX = | 0. | ! |
| ! D13 | D(7,6,3,2)   | 180.      | -DE/DX = | 0. | ! |
| ! D14 | D(7,6,3,4)   | 0.        | -DE/DX = | 0. | ! |
| ! D15 | D(9,6,3,2)   | 0.        | -DE/DX = | 0. | ! |
| ! D16 | D(9,6,3,4)   | 180.      | -DE/DX = | 0. | ! |
| ! D17 | D(10,7,6,3)  | 0.        | -DE/DX = | 0. | ! |
| ! D18 | D(10,7,6,9)  | 180.      | -DE/DX = | 0. | ! |
| ! D19 | D(12,7,6,3)  | 180.      | -DE/DX = | 0. | ! |
| ! D20 | D(12,7,6,9)  | 0.        | -DE/DX = | 0. | ! |
| ! D21 | D(13,8,4,3)  | 0.        | -DE/DX = | 0. | ! |
| ! D22 | D(13,8,4,5)  | 180.      | -DE/DX = | 0. | ! |
| ! D23 | D(14,8,4,3)  | -120.7431 | -DE/DX = | 0. | ! |
| ! D24 | D(14,8,4,5)  | 59.2569   | -DE/DX = | 0. | ! |
| ! D25 | D(15,8,4,3)  | 120.7431  | -DE/DX = | 0. | ! |
| ! D26 | D(15,8,4,5)  | -59.2569  | -DE/DX = | 0. | ! |
| ! D27 | D(16,9,6,3)  | 0.        | -DE/DX = | 0. | ! |
| ! D28 | D(16,9,6,7)  | 180.      | -DE/DX = | 0. | ! |
| ! D29 | D(17,9,6,3)  | -120.7431 | -DE/DX = | 0. | ! |
| ! D30 | D(17,9,6,7)  | 59.2569   | -DE/DX = | 0. | ! |
| ! D31 | D(18,9,6,3)  | 120.7431  | -DE/DX = | 0. | ! |
| ! D32 | D(18,9,6,7)  | -59.2569  | -DE/DX = | 0. | ! |
| ! D33 | D(7,10,5,4)  | 0.        | -DE/DX = | 0. | ! |
| ! D34 | D(7,10,5,11) | 180.      | -DE/DX = | 0. | ! |
| ! D35 | D(19,10,5,4) | 180.      | -DE/DX = | 0. | ! |

|       |               |           |          |    |   |
|-------|---------------|-----------|----------|----|---|
| ! D36 | D(19,10,5,11) | 0.        | -DE/DX = | 0. | ! |
| ! D37 | D(5,10,7,6)   | 0.        | -DE/DX = | 0. | ! |
| ! D38 | D(5,10,7,12)  | 180.      | -DE/DX = | 0. | ! |
| ! D39 | D(19,10,7,6)  | 180.      | -DE/DX = | 0. | ! |
| ! D40 | D(19,10,7,12) | 0.        | -DE/DX = | 0. | ! |
| ! D41 | D(8,13,2,1)   | 180.      | -DE/DX = | 0. | ! |
| ! D42 | D(8,13,2,3)   | 0.        | -DE/DX = | 0. | ! |
| ! D43 | D(8,13,2,16)  | 0.        | -DE/DX = | 0. | ! |
| ! D44 | D(2,13,8,4)   | 0.        | -DE/DX = | 0. | ! |
| ! D45 | D(2,13,8,14)  | 122.3443  | -DE/DX = | 0. | ! |
| ! D46 | D(2,13,8,15)  | -122.3443 | -DE/DX = | 0. | ! |
| ! D47 | D(9,16,2,1)   | 180.      | -DE/DX = | 0. | ! |
| ! D48 | D(9,16,2,3)   | 0.        | -DE/DX = | 0. | ! |
| ! D49 | D(9,16,2,13)  | 0.        | -DE/DX = | 0. | ! |
| ! D50 | D(2,16,9,6)   | 0.        | -DE/DX = | 0. | ! |
| ! D51 | D(2,16,9,17)  | 122.3443  | -DE/DX = | 0. | ! |
| ! D52 | D(2,16,9,18)  | -122.3443 | -DE/DX = | 0. | ! |

-----  
 GradGradGradGradGradGradGradGradGradGradGradGradGradGradGradGradGradGradGradGrad

\*\*\*\*\*

Population analysis using the SCF density.

\*\*\*\*\*

#### Orbital Symmetries:

|          |      |      |      |      |      |      |      |      |      |      |
|----------|------|------|------|------|------|------|------|------|------|------|
| Occupied | (A1) | (A1) | (A1) | (A1) | (B2) | (A1) | (B2) | (A1) | (B2) | (A1) |
|          | (A1) | (A1) | (B2) | (A1) | (A1) | (B2) | (A1) | (B2) | (A1) | (B2) |
|          | (A1) | (B1) | (A1) | (A2) | (B2) | (A1) | (B1) | (B2) | (B2) | (A1) |
|          | (B1) | (B2) | (A1) | (A2) | (B1) |      |      |      |      |      |
| Virtual  | (B1) | (A2) | (B2) | (A1) | (A1) | (B2) | (B1) | (B2) | (B1) | (A1) |
|          | (A1) | (A2) | (A1) | (B2) | (B1) | (B2) | (B1) | (A1) | (A1) | (B2) |
|          | (A2) | (B1) | (A1) | (B1) | (A1) | (A1) | (B2) | (B2) | (A1) | (B1) |
|          | (A2) | (B2) | (A1) | (B1) | (A2) | (B2) | (A1) | (B2) | (A1) | (B2) |
|          | (A1) | (A1) | (B1) | (A1) | (B2) | (B1) | (B2) | (A1) | (A1) | (B2) |
|          | (A1) | (B2) | (A1) | (B2) | (A1) | (B2) | (A1) | (A1) | (A1) | (B2) |
|          | (B2) | (A1) | (B2) | (A1) | (B1) | (A1) | (B2) | (B1) | (A2) | (B2) |
|          | (A1) | (A1) | (A2) | (B1) | (B2) | (B1) | (B2) | (A1) | (A2) | (B1) |
|          | (A1) | (B1) | (B2) | (A1) | (B2) | (A2) | (A1) | (A1) | (B2) | (B1) |
|          | (B1) | (B2) | (A1) | (A1) | (B2) | (B2) | (A1) | (A1) | (B2) | (A1) |
|          | (B2) | (A1) | (B2) | (A2) | (A1) | (A1) | (B2) | (B1) | (A2) | (A1) |
|          | (B2) | (A1) | (B1) | (B1) | (A2) | (A1) | (A2) | (A1) | (B2) | (A1) |
|          | (B1) | (B2) | (A1) | (B2) | (A1) | (B2) | (A2) | (A1) | (B1) | (B2) |
|          | (A2) | (A1) | (A1) | (B2) | (A1) | (A2) | (B1) | (A1) | (B1) | (A1) |
|          | (B2) | (B1) | (A2) | (B2) | (A2) | (A1) | (A1) | (B1) | (B2) | (A1) |
|          | (B2) | (A2) | (A1) | (B2) | (A1) | (B2) | (A1) | (B1) | (B2) | (A1) |
|          | (B2) | (A1) | (A1) | (A1) | (A1) | (B2) | (A1) | (B2) | (A1) | (A1) |
|          | (B2) | (A1) | (A1) |      |      |      |      |      |      |      |

The electronic state is 1-A1.

|       |                  |    |           |           |          |          |          |
|-------|------------------|----|-----------|-----------|----------|----------|----------|
| Alpha | occ. eigenvalues | -- | -14.07580 | -10.00044 | -9.96709 | -9.96458 | -9.96458 |
| Alpha | occ. eigenvalues | -- | -9.95078  | -9.94720  | -9.94718 | -9.93818 | -9.93818 |
| Alpha | occ. eigenvalues | -- | -.87525   | -.78557   | -.71870  | -.70405  | -.65153  |
| Alpha | occ. eigenvalues | -- | -.62089   | -.58639   | -.53280  | -.50369  | -.44152  |
| Alpha | occ. eigenvalues | -- | -.43361   | -.39490   | -.38881  | -.37540  | -.37056  |
| Alpha | occ. eigenvalues | -- | -.36611   | -.35120   | -.34221  | -.32727  | -.31996  |

|                         |    |         |         |         |         |         |
|-------------------------|----|---------|---------|---------|---------|---------|
| Alpha occ. eigenvalues  | -- | -.30691 | -.29623 | -.26299 | -.22425 | -.22408 |
| Alpha virt. eigenvalues | -- | -.06914 | -.05435 | -.02362 | -.01273 | .00274  |
| Alpha virt. eigenvalues | -- | .00435  | .00925  | .02427  | .02614  | .03031  |
| Alpha virt. eigenvalues | -- | .04132  | .04956  | .04977  | .06515  | .06671  |
| Alpha virt. eigenvalues | -- | .07213  | .07847  | .08362  | .08862  | .09971  |
| Alpha virt. eigenvalues | -- | .10316  | .10786  | .11053  | .11887  | .12367  |
| Alpha virt. eigenvalues | -- | .12697  | .14662  | .14872  | .15207  | .15582  |
| Alpha virt. eigenvalues | -- | .15839  | .16007  | .16667  | .17553  | .18513  |
| Alpha virt. eigenvalues | -- | .18576  | .20064  | .20142  | .20429  | .21209  |
| Alpha virt. eigenvalues | -- | .21564  | .22300  | .23163  | .23641  | .24104  |
| Alpha virt. eigenvalues | -- | .24783  | .25273  | .25411  | .25796  | .26686  |
| Alpha virt. eigenvalues | -- | .27301  | .28243  | .29080  | .31087  | .32187  |
| Alpha virt. eigenvalues | -- | .32665  | .33364  | .35908  | .37021  | .39636  |
| Alpha virt. eigenvalues | -- | .41008  | .48294  | .50249  | .53302  | .61715  |
| Alpha virt. eigenvalues | -- | .61969  | .62266  | .63719  | .64500  | .64616  |
| Alpha virt. eigenvalues | -- | .65746  | .67005  | .68337  | .68445  | .68679  |
| Alpha virt. eigenvalues | -- | .70549  | .71436  | .73124  | .73257  | .75628  |
| Alpha virt. eigenvalues | -- | .76243  | .78981  | .82170  | .83725  | .83952  |
| Alpha virt. eigenvalues | -- | .86426  | .87317  | .88529  | .89077  | .92396  |
| Alpha virt. eigenvalues | -- | .94331  | .96891  | .97252  | 1.00907 | 1.01305 |
| Alpha virt. eigenvalues | -- | 1.04216 | 1.07549 | 1.10708 | 1.10949 | 1.11768 |
| Alpha virt. eigenvalues | -- | 1.13944 | 1.16391 | 1.16740 | 1.17625 | 1.21554 |
| Alpha virt. eigenvalues | -- | 1.24053 | 1.24674 | 1.26275 | 1.32099 | 1.32914 |
| Alpha virt. eigenvalues | -- | 1.33977 | 1.34066 | 1.35742 | 1.40014 | 1.41518 |
| Alpha virt. eigenvalues | -- | 1.42702 | 1.46714 | 1.50440 | 1.52797 | 1.66405 |
| Alpha virt. eigenvalues | -- | 1.68401 | 1.68625 | 1.72431 | 1.76520 | 1.79099 |
| Alpha virt. eigenvalues | -- | 1.79459 | 1.80540 | 1.81070 | 1.84404 | 1.84460 |
| Alpha virt. eigenvalues | -- | 1.86722 | 1.89314 | 1.95970 | 1.98649 | 2.03424 |
| Alpha virt. eigenvalues | -- | 2.05421 | 2.08322 | 2.08870 | 2.10903 | 2.15063 |
| Alpha virt. eigenvalues | -- | 2.17955 | 2.21661 | 2.23035 | 2.26550 | 2.26777 |
| Alpha virt. eigenvalues | -- | 2.28058 | 2.29182 | 2.32347 | 2.34888 | 2.43456 |
| Alpha virt. eigenvalues | -- | 2.45360 | 2.53959 | 2.54732 | 2.57624 | 2.64785 |
| Alpha virt. eigenvalues | -- | 2.68503 | 2.70878 | 2.70900 | 2.81983 | 2.88761 |
| Alpha virt. eigenvalues | -- | 3.11067 | 3.18537 | 3.39068 | 4.10022 | 4.15361 |
| Alpha virt. eigenvalues | -- | 4.17207 | 4.20458 | 4.24467 | 4.27976 | 4.33859 |
| Alpha virt. eigenvalues | -- | 4.38278 | 4.41107 | 4.70018 |         |         |

Condensed to atoms (all electrons):

|    |   | 1        | 2         | 3          | 4          | 5         | 6          |
|----|---|----------|-----------|------------|------------|-----------|------------|
| 1  | C | 5.996020 | .850749   | .173591    | -.390577   | .196901   | -.390577   |
| 2  | N | .850749  | 6.893821  | -1.801288  | .792869    | -.384972  | .792869    |
| 3  | C | .173591  | -1.801288 | 40.055905  | -18.423201 | 7.303275  | -18.423201 |
| 4  | C | -.390577 | .792869   | -18.423201 | 23.446598  | -6.914055 | 9.249218   |
| 5  | C | .196901  | -.384972  | 7.303275   | -6.914055  | 13.864330 | -7.123725  |
| 6  | C | -.390577 | .792869   | -18.423201 | 9.249218   | -7.123725 | 23.446598  |
| 7  | C | .196901  | -.384972  | 7.303275   | -7.123725  | 2.919168  | -6.914055  |
| 8  | C | -.164375 | .168974   | -1.746045  | .879510    | -1.619819 | .496696    |
| 9  | C | -.164375 | .168974   | -1.746045  | .496696    | -.281853  | .879510    |
| 10 | C | -.071014 | .100833   | -5.714147  | 3.238493   | -1.537247 | 3.238493   |
| 11 | H | .000570  | -.000645  | .173376    | -.096350   | .340407   | -.024234   |
| 12 | H | .000570  | -.000645  | .173376    | -.024234   | .035753   | -.096350   |
| 13 | H | .001098  | .016432   | -.181203   | .021488    | .129220   | -.082141   |
| 14 | H | .001275  | .000455   | .175171    | -.157660   | -.126992  | .006833    |
| 15 | H | .001275  | .000455   | .175171    | -.157660   | -.126992  | .006833    |
| 16 | H | .001098  | .016432   | -.181203   | -.082141   | .010854   | .021488    |
| 17 | H | .001275  | .000455   | .175171    | .006833    | .004150   | -.157660   |
| 18 | H | .001275  | .000455   | .175171    | .006833    | .004150   | -.157660   |
| 19 | H | -.000099 | .000105   | -.013443   | .052472    | -.078733  | .052472    |

|      | 7         | 8         | 9         | 10        | 11       | 12       |
|------|-----------|-----------|-----------|-----------|----------|----------|
| 1 C  | .196901   | -.164375  | -.164375  | -.071014  | .000570  | .000570  |
| 2 N  | -.384972  | .168974   | .168974   | .100833   | -.000645 | -.000645 |
| 3 C  | 7.303275  | -1.746045 | -1.746045 | -5.714147 | .173376  | .173376  |
| 4 C  | -7.123725 | .879510   | .496696   | 3.238493  | -.096350 | -.024234 |
| 5 C  | 2.919168  | -1.619819 | -.281853  | -1.537247 | .340407  | .035753  |
| 6 C  | -6.914055 | .496696   | .879510   | 3.238493  | -.024234 | -.096350 |
| 7 C  | 13.864330 | -.281853  | -1.619819 | -1.537247 | .035753  | .340407  |
| 8 C  | -.281853  | 7.700177  | -.085898  | .118740   | -.040961 | .001793  |
| 9 C  | -1.619819 | -.085898  | 7.700177  | .118740   | .001793  | -.040961 |
| 10 C | -1.537247 | .118740   | .118740   | 7.426635  | -.123251 | -.123251 |
| 11 H | .035753   | -.040961  | .001793   | -.123251  | .568518  | -.000184 |
| 12 H | .340407   | .001793   | -.040961  | -.123251  | -.000184 | .568518  |
| 13 H | .010854   | .428617   | -.003436  | -.004378  | .000130  | .000000  |
| 14 H | .004150   | .444367   | -.000551  | -.021724  | .001072  | .000000  |
| 15 H | .004150   | .444367   | -.000551  | -.021724  | .001072  | .000000  |
| 16 H | .129220   | -.003436  | .428617   | -.004378  | .000000  | .000130  |
| 17 H | -.126992  | -.000551  | .444367   | -.021724  | .000000  | .001072  |
| 18 H | -.126992  | -.000551  | .444367   | -.021724  | .000000  | .001072  |
| 19 H | -.078733  | -.000708  | -.000708  | .352269   | -.005026 | -.005026 |
|      | 13        | 14        | 15        | 16        | 17       | 18       |
| 1 C  | .001098   | .001275   | .001275   | .001098   | .001275  | .001275  |
| 2 N  | .016432   | .000455   | .000455   | .016432   | .000455  | .000455  |
| 3 C  | -.181203  | .175171   | .175171   | -.181203  | .175171  | .175171  |
| 4 C  | .021488   | -.157660  | -.157660  | -.082141  | .006833  | .006833  |
| 5 C  | .129220   | -.126992  | -.126992  | .010854   | .004150  | .004150  |
| 6 C  | -.082141  | .006833   | .006833   | .021488   | -.157660 | -.157660 |
| 7 C  | .010854   | .004150   | .004150   | .129220   | -.126992 | -.126992 |
| 8 C  | .428617   | .444367   | .444367   | -.003436  | -.000551 | -.000551 |
| 9 C  | -.003436  | -.000551  | -.000551  | .428617   | .444367  | .444367  |
| 10 C | -.004378  | -.021724  | -.021724  | -.004378  | -.021724 | -.021724 |
| 11 H | .000130   | .001072   | .001072   | .000000   | .000000  | .000000  |
| 12 H | .000000   | .000000   | .000000   | .000130   | .001072  | .001072  |
| 13 H | .481312   | -.025020  | -.025020  | .000000   | .000000  | .000000  |
| 14 H | -.025020  | .504702   | -.031924  | .000000   | .000000  | .000000  |
| 15 H | -.025020  | -.031924  | .504702   | .000000   | .000000  | .000000  |
| 16 H | .000000   | .000000   | .000000   | .481312   | -.025020 | -.025020 |
| 17 H | .000000   | .000000   | .000000   | -.025020  | .504702  | -.031924 |
| 18 H | .000000   | .000000   | .000000   | -.025020  | -.031924 | .504702  |
| 19 H | .000002   | -.000002  | -.000002  | .000002   | -.000002 | -.000002 |
|      | 19        |           |           |           |          |          |
| 1 C  | -.000099  |           |           |           |          |          |
| 2 N  | .000105   |           |           |           |          |          |
| 3 C  | -.013443  |           |           |           |          |          |
| 4 C  | .052472   |           |           |           |          |          |
| 5 C  | -.078733  |           |           |           |          |          |
| 6 C  | .052472   |           |           |           |          |          |
| 7 C  | -.078733  |           |           |           |          |          |
| 8 C  | -.000708  |           |           |           |          |          |
| 9 C  | -.000708  |           |           |           |          |          |
| 10 C | .352269   |           |           |           |          |          |
| 11 H | -.005026  |           |           |           |          |          |
| 12 H | -.005026  |           |           |           |          |          |
| 13 H | .000002   |           |           |           |          |          |
| 14 H | -.000002  |           |           |           |          |          |
| 15 H | -.000002  |           |           |           |          |          |
| 16 H | .000002   |           |           |           |          |          |

17 H    -.000002  
 18 H    -.000002  
 19 H    .560992

Total atomic charges:

1  
 1 C    -.241581  
 2 N    -.231356  
 3 C    -1.653704  
 4 C    1.178594  
 5 C    -.613819  
 6 C    1.178594  
 7 C    -.613819  
 8 C    -.739044  
 9 C    -.739044  
 10 C    .607608  
 11 H    .167960  
 12 H    .167960  
 13 H    .232046  
 14 H    .225848  
 15 H    .225848  
 16 H    .232046  
 17 H    .225848  
 18 H    .225848  
 19 H    .164168

Sum of Mulliken charges= .00000

Atomic charges with hydrogens summed into heavy atoms:

1  
 1 C    -.241581  
 2 N    -.231356  
 3 C    -1.653704  
 4 C    1.178594  
 5 C    -.445859  
 6 C    1.178594  
 7 C    -.445859  
 8 C    -.055303  
 9 C    -.055303  
 10 C    .771775  
 11 H    .000000  
 12 H    .000000  
 13 H    .000000  
 14 H    .000000  
 15 H    .000000  
 16 H    .000000  
 17 H    .000000  
 18 H    .000000  
 19 H    .000000

Sum of Mulliken charges= .00000

Electronic spatial extent (au):  $\langle R^2 \rangle = 1416.1361$

Charge= .0000 electrons

Dipole moment (Debye):

X= .0000    Y= .0000    Z= -3.7515    Tot= 3.7515

Quadrupole moment (Debye-Ang):

XX= -62.6108    YY= -52.3265    ZZ= -70.6796  
 XY= .0000    XZ= .0000    YZ= .0000

Octapole moment (Debye-Ang\*\*2):

XXX= .0000    YYY= .0000    ZZZ= -74.3335    XYY= .0000  
 XXY= .0000    XXZ= 1.6368    XZZ= .0000    YZZ= .0000

```

YYZ=      -4.8430  XYZ=      .0000
Hexadecapole moment (Debye-Ang**3):
XXXX=     -89.2304  YYYY=    -918.7693  ZZZZ=   -1192.0179  XXXY=      .0000
XXXZ=      .0000  YYXZ=      .0000  YYYZ=      .0000  ZZZX=      .0000
ZZZY=      .0000  XXYY=   -170.6239  XXZZ=   -198.0694  YYZZ=   -318.3993
XXYZ=      .0000  YYXZ=      .0000  ZZZY=      .0000
N-N= 4.666328469088D+02  E-N=-1.865535287537D+03  KE= 3.988457422475D+02
Symmetry A1  KE= 2.676298677961D+02
Symmetry A2  KE= 4.265439485176D+00
Symmetry B1  KE= 9.181333853912D+00
Symmetry B2  KE= 1.177691011123D+02
Exact polarizability:  67.694      .000 130.125      .000      .000 149.498
Approx polarizability: 114.430      .000 233.478      .000      .000 299.839
1\1\ PUCC-LIVELY\Freq\RBLYP\6-31+G(d)\C9H9N1\ZAVARINE\23-Sep-1997\0\#\#
BLYP 6-31+G* FREQ GEOM=CHECKPOINT GUESS=CHECKPOINT\Xylil frequencies
\0,1\C,0.,0.,-3.0484067567\N,0.,0.,-1.8572748195\C,0.,0.,-0.458762440
9\C,1.2488240846,0.,0.2272875495\C,1.2167778377,0.,1.6363224256\C,-1.2
488240846,0.,0.2272875495\C,-1.2167778377,0.,1.6363224256\C,2.58158955
16,0.,-0.5040609342\C,-2.5815895516,0.,-0.5040609342\C,0.,0.,2.3385642
927\H,2.1639674972,0.,2.1858465434\H,-2.1639674972,0.,2.1858465434\H,2
.4618704203,0.,-1.5962316123\H,3.1777140383,-0.8883413897,-0.228496476
1\H,3.1777140383,0.8883413897,-0.2284964761\H,-2.4618704203,0.,-1.5962
316123\H,-3.1777140383,0.8883413897,-0.2284964761\H,-3.1777140383,-0.8
883413897,-0.2284964761\H,0.,0.,3.4327207175\Version=IBM-RS6000-G94Re
vD.2\State=1-A1\HF=-402.9300856\RMSD=8.620e-09\RMSF=6.418e-05\Dipole=0
.,0.,1.4759478\DipoleDeriv=-0.2127371,0.,0.,0.,-0.2191707,0.,0.,0.,0.5
734557,-0.1430886,0.,0.,0.,-0.0296045,0.,0.,0.,-1.0286745,0.032608,0.,
0.,0.,0.0972617,0.,0.,0.,0.417871,0.2813151,0.,-0.0386556,0.,-0.026934
,0.,-0.1546352,0.,0.0281169,-0.0330786,0.,0.1015648,0.,-0.1494399,0.,0
.2013529,0.,-0.0783811,0.2813151,0.,0.0386556,0.,-0.026934,0.,0.154635
2,0.,0.0281169,-0.0330786,0.,-0.1015648,0.,-0.1494399,0.,-0.2013529,0.
,-0.0783811,-0.0448212,0.,0.0515835,0.,0.1254788,0.,-0.0338016,0.,0.06
06278,-0.0448212,0.,-0.0515835,0.,0.1254788,0.,0.0338016,0.,0.0606278,
0.0875648,0.,0.,0.,-0.1175648,0.,0.,0.,0.0915782,-0.0833532,0.,-0.0891
863,0.,0.1250606,0.,-0.0666087,0.,0.013795,-0.0579552,0.,-0.0335113,0.,0.076832
6,0.,0.0568975,0.,-0.0761186,-0.0438924,0.0584362,0.017535,0.1101191,-
0.0416261,0.0314933,0.0115771,0.0583426,0.0457507,-0.0438924,-0.058436
2,0.017535,-0.1101191,-0.0416261,-0.0314933,0.0115771,-0.0583426,0.045
7507,0.0579552,0.,0.0335113,0.,0.0768326,0.,-0.0568975,0.,-0.0761186,-
0.0438924,0.0584362,-0.017535,0.1101191,-0.0416261,-0.0314933,-0.01157
71,-0.0583426,0.0457507,-0.0438924,-0.0584362,-0.017535,-0.1101191,-0.
0416261,0.0314933,-0.0115771,0.0583426,0.0457507,0.0551881,0.,0.,0.,0.
1335862,0.,0.,0.,-0.1333131\Polar=130.1247385,0.,67.6942984,0.,0.,149.
4976859\PG=C02V [ C2(H1C1C1N1C1),SGV(C6H4),X(H4)]\NImag=2\0.00963060,0
.,0.01274184,0.,0.,0.99812929,-0.01445414,0.,0.,0.10217280,0.,-0.02430
676,0.,0.,0.06470900,0.,0.,-0.98357635,0.,0.,1.31990493,0.01084111,0.,
0.,-0.07901118,0.,0.,0.59524969,0.,0.00923323,0.,0.,-0.05305709,0.,0.,
0.14641690,0.,0.,-0.02753400,0.,0.,-0.23855455,0.,0.,0.57294374,-0.002
53313,0.,0.00802187,0.00456204,0.,-0.02028624,-0.23461500,0.,-0.079347
40,0.58037690,0.,0.00155305,0.,0.,0.00325691,0.,0.,-0.06609467,0.,0.,0
.16428562,0.00105014,0.,0.00626471,-0.03274934,0.,-0.05135805,-0.03262
460,0.,-0.12788808,0.00220787,0.,0.61952026,0.00055582,0.,0.00086432,-
0.00594730,0.,-0.00661295,0.02555604,0.,-0.02401408,-0.11356016,0.,-0.
02803103,0.68775373,0.,-0.00073542,0.,0.,0.00688509,0.,0.,0.00620206,0
.,0.,-0.06291565,0.,0.,0.12113665,0.00012641,0.,-0.00210969,-0.0012043
1,0.,0.00600714,-0.06257384,0.,-0.03006226,0.02634996,0.,-0.30028642,0

```

.01809414,0.,0.63441204,-0.00253313,0.,-0.00802187,0.00456204,0.,0.020  
28624,-0.23461501,0.,0.07934740,-0.04668643,0.,-0.01754514,-0.01161871  
,0.,0.02228276,0.58037690,0.,0.00155305,0.,0.,0.00325691,0.,0.,-0.0660  
9467,0.,0.,0.00750441,0.,0.,-0.00501972,0.,0.,0.16428562,-0.00105014,0  
,0.00626471,0.03274934,0.,-0.05135805,0.03262460,0.,-0.12788808,0.017  
54514,0.,0.05431960,0.02453079,0.,-0.04146679,-0.00220787,0.,0.6195202  
6,0.00055582,0.,-0.00086432,-0.00594730,0.,0.00661295,0.02555604,0.,0.  
02401408,-0.01161871,0.,-0.02453079,-0.05400276,0.,0.01884947,-0.11356  
016,0.,0.02803103,0.68775373,0.,-0.00073542,0.,0.,0.00688509,0.,0.,0.0  
0620206,0.,0.,-0.00501972,0.,0.,0.00791554,0.,0.,-0.06291565,0.,0.,0.1  
2113665,-0.00012641,0.,-0.00210969,0.00120431,0.,0.00600714,0.06257384  
,0.,-0.03006226,-0.02228276,0.,-0.04146679,-0.01884947,0.,0.05357944,-  
0.02634996,0.,-0.30028642,-0.01809414,0.,0.63441204,-0.00027541,0.,0.0  
0002159,-0.00157683,0.,0.00337250,-0.02563895,0.,0.00732801,-0.1622802  
7,0.,0.04247813,-0.00311567,0.,0.01064223,-0.00083087,0.,-0.00139931,-  
0.00242768,0.,-0.00133157,0.46218702,0.,0.00037142,0.,0.,-0.00306337,0  
,0.,0.00541525,0.,0.,-0.06681562,0.,0.,0.00350852,0.,0.,0.00564549,0.  
,0.,-0.00070310,0.,0.,0.50855419,-0.00031349,0.,0.00022508,-0.00073595  
,0.,-0.00065799,-0.01040785,0.,0.01235857,0.04586917,0.,-0.11033554,0.  
03251844,0.,-0.01785044,-0.00245080,0.,-0.00242590,-0.00023025,0.,0.00  
024980,0.03810145,0.,0.54725011,-0.00027541,0.,-0.00002159,-0.00157683  
,0.,-0.00337250,-0.02563895,0.,-0.00732801,-0.00083087,0.,0.00139931,-  
0.00242768,0.,0.00133157,-0.16228027,0.,-0.04247813,-0.00311567,0.,-0.  
01064223,-0.00012999,0.,-0.00050562,0.46218702,0.,0.00037142,0.,0.,-0.  
00306337,0.,0.,0.00541525,0.,0.,0.00564549,0.,0.,-0.00070310,0.,0.,-0.  
06681562,0.,0.,0.00350852,0.,0.,0.00038938,0.,0.,0.50855419,0.00031349  
,0.,0.00022508,0.00073595,0.,-0.00065799,0.01040785,0.,0.01235857,0.00  
245080,0.,-0.00242590,0.00023025,0.,0.00024980,-0.04586917,0.,-0.11033  
554,-0.03251844,0.,-0.01785044,0.00050562,0.,0.00063533,-0.03810145,0.  
,0.54725011,0.00029821,0.,0.,-0.00044562,0.,0.,-0.05397394,0.,0.,0.024  
87780,0.,0.06720874,-0.27049885,0.,0.05919504,0.02487780,0.,-0.0672087  
4,-0.27049885,0.,-0.05919504,0.00459462,0.,-0.00232932,0.00459462,0.,0  
.00232932,0.63241485,0.,0.00018196,0.,0.,-0.00099488,0.,0.,-0.00545228  
,0.,0.,0.00637172,0.,0.,-0.05527877,0.,0.,0.00637172,0.,0.,-0.05527877  
,0.,0.,0.00449992,0.,0.,0.00449992,0.,0.,0.12188858,0.,0.,0.00158319,0  
,0.,-0.00329017,0.,0.,0.00019875,0.02801476,0.,-0.02594197,0.11525851  
,0.,-0.16844967,-0.02801476,0.,-0.02594197,-0.11525851,0.,-0.16844967,  
-0.00322927,0.,-0.00478384,0.00322927,0.,-0.00478384,0.,0.,0.69735141,  
0.00000214,0.,0.00014956,0.00033261,0.,0.00000700,0.00123484,0.,0.0007  
8816,0.00211775,0.,0.00111025,-0.25069588,0.,-0.11359024,0.00016443,0.  
,0.00072119,-0.00269146,0.,0.00425854,0.00054864,0.,0.00112724,0.00005  
987,0.,-0.00014204,-0.01907247,0.,-0.01549331,0.26734011,0.,-0.0001635  
2,0.,0.,0.00053739,0.,0.,0.00610612,0.,0.,0.00262982,0.,0.,-0.03294576  
,0.,0.,-0.00072749,0.,0.,0.00626060,0.,0.,-0.00219921,0.,0.,-0.0005436  
4,0.,0.,0.00231194,0.,0.,0.02317178,0.00017359,0.,0.00014526,-0.001680  
09,0.,-0.00164956,0.00203311,0.,-0.00396350,-0.02747510,0.,-0.01278399  
,0.11340806,0.,-0.12197903,0.00063505,0.,-0.00082846,0.00273263,0.,-0  
.00106915,-0.00119006,0.,0.00160250,-0.00002401,0.,0.00015102,0.014702  
42,0.,0.01116935,0.12212781,0.,0.12848560,0.00000214,0.,-0.00014956,0.  
00033261,0.,-0.00000700,0.00123484,0.,-0.00078816,0.00016443,0.,-0.000  
72119,-0.00269146,0.,-0.00425854,0.00211775,0.,-0.00111025,-0.25069588  
,0.,0.11359024,0.00005987,0.,0.00014204,0.00054864,0.,-0.00112724,-0.0  
1907247,0.,0.01549331,-0.00109822,0.,0.00081483,0.26734011,0.,-0.00016  
352,0.,0.,0.00053739,0.,0.,0.00610612,0.,0.,-0.00072749,0.,0.,0.006260  
60,0.,0.,0.00262982,0.,0.,-0.03294576,0.,0.,-0.00054364,0.,0.,-0.00219  
921,0.,0.,0.00231194,0.,0.,0.00028637,0.,0.,0.02317178,-0.00017359,0.,  
0.00014526,0.00168009,0.,-0.00164956,-0.00203311,0.,-0.00396350,-0.000

63505,0.,-0.00082846,-0.00273263,0.,-0.00106915,0.02747510,0.,-0.01278  
399,0.11340806,0.,-0.12197903,0.00002401,0.,0.00015102,0.00119006,0.,0  
.00160250,-0.01470242,0.,0.01116935,-0.00081483,0.,0.00040842,-0.12212  
781,0.,0.12848560,-0.00092552,0.,-0.00130431,-0.00165035,0.,-0.0003867  
1,0.00074169,0.,0.00131834,0.00545169,0.,0.02925242,-0.00586622,0.,0.0  
0144418,0.00007187,0.,0.00033725,-0.00008636,0.,-0.00020421,-0.0509563  
8,0.,-0.03329822,0.00005845,0.,-0.00002125,0.00072838,0.,0.00139069,0.  
00003636,0.,0.00013806,-0.00002484,0.,-0.00005064,0.05742388,0.,0.0000  
0518,0.,0.,-0.00025930,0.,0.,0.00061818,0.,0.,-0.00192689,0.,0.,0.0009  
8888,0.,0.,-0.00000138,0.,0.,-0.00005528,0.,0.,-0.04628881,0.,0.,-0.00  
003076,0.,0.,0.00059434,0.,0.,-0.00029240,0.,0.,-0.00003308,0.,0.,0.04  
526378,-0.00083329,0.,0.00055786,-0.00272059,0.,0.00038846,-0.00145393  
,0.,-0.00130157,-0.00055116,0.,-0.01376677,0.00299435,0.,-0.00015066,0  
.00018717,0.,-0.00021648,0.00012251,0.,0.00017249,-0.02833376,0.,-0.30  
200796,-0.00005906,0.,-0.00002847,-0.00060177,0.,-0.00054319,-0.000088  
17,0.,0.00024878,0.00004566,0.,0.00001648,0.03353270,0.,0.32907690,0.0  
0001384,-0.00007241,0.00018131,0.00000246,0.00056836,-0.00029679,-0.00  
154292,0.00054636,0.00305929,-0.01993295,0.02094663,-0.00537402,0.0011  
3082,-0.00079834,-0.00201524,-0.00059839,-0.00105927,-0.00045280,0.000  
12215,0.00018874,0.00018576,-0.11030544,0.10698406,-0.03421094,-0.0001  
0492,-0.00010291,0.00017874,-0.00081476,-0.00093755,0.00005645,0.00039  
626,0.00069859,0.00041141,0.00000379,0.00011571,0.00004235,-0.00228326  
,0.00272224,-0.00126253,0.12451775,-0.00000023,-0.00001239,-0.00010266  
, -0.00002651,0.00004111,0.00011400,-0.00065844,-0.00040761,-0.00030310  
, -0.00098751,0.00300699,-0.00121625,-0.00009904,0.00117723,0.00075779,  
-0.00019432,-0.00018424,0.00011005,-0.00023836,-0.00006619,-0.00019695  
,0.10613523,-0.20443151,0.05189562,-0.00003434,0.00000952,-0.00000801,  
0.00038755,0.00023752,-0.00029869,0.00002034,-0.00037871,-0.00041040,-  
0.00001604,-0.00004485,-0.00002215,-0.00142093,0.00076349,0.00011441,-  
0.11637816,0.22221364,-0.00008427,-0.00006357,0.00029356,-0.00073285,-  
0.00051528,0.00006674,0.00016362,-0.00016098,-0.00152916,0.00922546,-0  
.01283561,0.00375369,0.00148561,0.00011262,-0.00026431,0.00049872,0.00  
061809,-0.00061354,0.00075539,-0.00021455,0.00052635,-0.03329063,0.051  
47469,-0.06182920,-0.00000601,0.00013010,-0.00005009,-0.00107575,0.000  
27915,0.00042005,-0.00021535,-0.00002372,-0.00041855,-0.00003149,0.000  
03374,0.00000155,-0.01616638,0.02684540,-0.00622668,0.03462088,-0.0580  
2139,0.06381866,0.00001384,0.00007241,0.00018131,0.00000246,-0.0005683  
6,-0.00029679,-0.00154292,-0.00054636,0.00305929,-0.01993295,-0.020946  
63,-0.00537402,0.00113082,0.00079834,-0.00201524,-0.00059839,0.0010592  
7,-0.00045280,0.00012215,-0.00018874,0.00018576,-0.11030544,-0.1069840  
6,-0.03421094,-0.00010492,0.00010291,0.00017874,-0.00081476,0.00093755  
,0.00005645,0.00039626,-0.00069859,0.00041141,0.00000379,-0.00011571,0  
.00004235,-0.00228326,-0.00272224,-0.00126253,0.00953714,0.01348147,0.  
00486733,0.12451775,0.00000023,-0.00001239,0.00010266,0.00002651,0.000  
04111,-0.00011400,0.00065844,-0.00040761,0.00030310,0.00098751,0.00300  
699,0.00121625,0.00009904,0.00117723,-0.00075779,0.00019432,-0.0001842  
4,-0.00011005,0.00023836,-0.00006619,0.00019695,-0.10613523,-0.2044315  
1,-0.05189562,0.00003434,0.00000952,0.00000801,-0.00038755,0.00023752,  
0.00029869,-0.00002034,-0.00037871,0.00041040,0.00001604,-0.00004485,0  
.00002215,0.00142093,0.00076349,-0.00011441,-0.01348147,-0.02191565,-0  
.00762323,0.11637816,0.22221364,-0.00008427,0.00006357,0.00029356,-0.0  
0073285,0.00051528,0.00006674,0.00016362,0.00016098,-0.00152916,0.0092  
2546,0.01283561,0.00375369,0.00148561,-0.00011262,-0.00026431,0.000498  
72,-0.00061809,-0.00061354,0.00075539,0.00021455,0.00052635,-0.0332906  
3,-0.05147469,-0.06182920,-0.00000601,-0.00013010,-0.00005009,-0.00107  
575,-0.00027915,0.00042005,-0.00021535,0.00002372,-0.00041855,-0.00003  
149,-0.00003374,0.00000155,-0.01616638,-0.02684540,-0.00622668,0.00486

733,0.00762323,0.00199232,0.03462088,0.05802139,0.06381866,-0.00092552  
0.,0.00130431,-0.00165035,0.,0.00038671,0.00074169,0.,-0.00131834,0.0  
0007187,0.,-0.00033725,-0.00008636,0.,0.00020421,0.00545169,0.,-0.0292  
5242,-0.00586622,0.,-0.00144418,0.00005845,0.,0.00002125,-0.05095638,0  
.,0.03329822,0.00072838,0.,-0.00139069,-0.00002484,0.,0.00005064,0.000  
03636,0.,-0.00013806,-0.00005400,0.,0.00003473,0.00001289,-0.00000994,  
0.00001742,0.00001289,0.00000994,0.00001742,0.05742388,0.,0.00000518,0  
.,0.,-0.00025930,0.,0.,0.00061818,0.,0.,-0.00000138,0.,0.,-0.00005528,  
0.,0.,-0.00192689,0.,0.,0.00098888,0.,0.,-0.00003076,0.,0.,-0.04628881  
0.,0.,0.00059434,0.,0.,-0.00003308,0.,0.,-0.00029240,0.,0.,0.00001394  
0.,0.00001308,-0.00000084,0.00000017,-0.00001308,-0.00000084,-0.00000  
017,0.,0.04526378,0.00083329,0.,0.00055786,0.00272059,0.,0.00038846,0.  
00145393,0.,-0.00130157,-0.00018717,0.,-0.00021648,-0.00012251,0.,0.00  
017249,0.00055116,0.,-0.01376677,-0.00299435,0.,-0.00015066,0.00005906  
0.,-0.00002847,0.02833376,0.,-0.30200796,0.00060177,0.,-0.00054319,-0  
.00004566,0.,0.00001648,0.00008817,0.,0.00024878,-0.00003473,0.,0.0000  
6184,-0.00001179,0.00000066,0.00003046,-0.00001179,-0.00000066,0.00003  
046,-0.03353270,0.,0.32907690,0.00001384,-0.00007241,-0.00018131,0.000  
00246,0.00056836,0.00029679,-0.00154292,0.00054636,-0.00305929,-0.0005  
9839,-0.00105927,0.00045280,0.00012215,0.00018874,-0.00018576,-0.01993  
295,0.02094663,0.00537402,0.00113082,-0.00079834,0.00201524,-0.0001049  
2,-0.00010291,-0.00017874,-0.11030544,0.10698406,0.03421094,-0.0008147  
6,-0.00093755,-0.00005645,0.00000379,0.00011571,-0.00004235,0.00039626  
0.00069859,-0.00041141,0.00001289,0.00001308,0.00001179,-0.00004606,-  
0.00000046,-0.00000903,-0.00010860,-0.00000433,0.00002432,-0.00228326,  
0.00272224,0.00126253,0.12451775,-0.00000023,-0.00001239,0.00010266,-0  
.00002651,0.00004111,-0.00011400,-0.00065844,-0.00040761,0.00030310,-0  
.00019432,-0.00018424,-0.00011005,-0.00023836,-0.00006619,0.00019695,-  
0.00098751,0.00300699,0.00121625,-0.00009904,0.00117723,-0.00075779,-0  
.00003434,0.00000952,0.00000801,0.10613523,-0.20443151,-0.05189562,0.0  
0038755,0.00023752,0.00029869,-0.00001604,-0.00004485,0.00002215,0.000  
02034,-0.00037871,0.00041040,-0.00000994,-0.00000084,-0.00000066,-0.00  
000046,-0.00000280,0.00000189,0.00000433,0.00000379,0.00000973,-0.0014  
2093,0.00076349,-0.00011441,-0.11637816,0.22221364,0.00008427,0.000063  
57,0.00029356,0.00073285,0.00051528,0.00006674,-0.00016362,0.00016098,  
-0.00152916,-0.00049872,-0.00061809,-0.00061354,-0.00075539,0.00021455  
0.00052635,-0.00922546,0.01283561,0.00375369,-0.00148561,-0.00011262,  
-0.00026431,0.00000601,-0.00013010,-0.00005009,0.03329063,-0.05147469,  
-0.06182920,0.00107575,-0.00027915,0.00042005,0.00003149,-0.00003374,0  
.00000155,0.00021535,0.00002372,-0.00041855,-0.00001742,-0.00000017,0.  
00003046,0.00000903,-0.00000189,-0.00000274,-0.00002432,0.00000973,0.0  
0003569,0.01616638,-0.02684540,-0.00622668,-0.03462088,0.05802139,0.06  
381866,0.00001384,0.00007241,-0.00018131,0.00000246,-0.00056836,0.0002  
9679,-0.00154292,-0.00054636,-0.00305929,-0.00059839,0.00105927,0.0004  
5280,0.00012215,-0.00018874,-0.00018576,-0.01993295,-0.02094663,0.0053  
7402,0.00113082,0.00079834,0.00201524,-0.00010492,0.00010291,-0.000178  
74,-0.11030544,-0.10698406,0.03421094,-0.00081476,0.00093755,-0.000056  
45,0.00000379,-0.00011571,-0.00004235,0.00039626,-0.00069859,-0.000411  
41,0.00001289,-0.00001308,0.00001179,-0.00010860,0.00000433,0.00002432  
,-0.00004606,0.00000046,-0.00000903,-0.00228326,-0.00272224,0.00126253  
0.00953714,0.01348147,-0.00486733,0.12451775,0.00000023,-0.00001239,-  
0.00010266,0.00002651,0.00004111,0.00011400,0.00065844,-0.00040761,-0.  
00030310,0.00019432,-0.00018424,0.00011005,0.00023836,-0.00006619,-0.0  
0019695,0.00098751,0.00300699,-0.00121625,0.00009904,0.00117723,0.0007  
5779,0.00003434,0.00000952,-0.00000801,-0.10613523,-0.20443151,0.05189  
562,-0.00038755,0.00023752,-0.00029869,0.00001604,-0.00004485,-0.00002  
215,-0.00002034,-0.00037871,-0.00041040,0.00000994,-0.00000084,0.00000

066,-0.00000433,0.00000379,-0.00000973,0.00000046,-0.00000280,-0.00000  
189,0.00142093,0.00076349,0.00011441,-0.01348147,-0.02191565,0.0076232  
3,0.11637816,0.22221364,0.00008427,-0.00006357,0.00029356,0.00073285,-  
0.00051528,0.00006674,-0.00016362,-0.00016098,-0.00152916,-0.00049872,  
0.00061809,-0.00061354,-0.00075539,-0.00021455,0.00052635,-0.00922546,  
-0.01283561,0.00375369,-0.00148561,0.00011262,-0.00026431,0.00000601,0  
.00013010,-0.00005009,0.03329063,0.05147469,-0.06182920,0.00107575,0.0  
0027915,0.00042005,0.00003149,0.00003374,0.00000155,0.00021535,-0.0000  
2372,-0.00041855,-0.00001742,0.00000017,0.00003046,-0.00002432,-0.0000  
0973,0.00003569,0.00000903,0.00000189,-0.00000274,0.01616638,0.0268454  
0,-0.00622668,-0.00486733,-0.00762323,0.00199232,-0.03462088,-0.058021  
39,0.06381866,-0.00001895,0.,0.,0.00028795,0.,0.,-0.00149122,0.,0.,-0.  
00443522,0.,0.00167492,0.00413952,0.,0.02750896,-0.00443522,0.,-0.0016  
7492,0.00413952,0.,-0.02750896,0.00060416,0.,0.00127126,0.00060416,0.,  
-0.00127126,-0.05629343,0.,0.,0.00094601,0.,-0.00036893,0.00094601,0.,  
0.00036893,-0.00040792,0.,0.00022606,0.00000019,0.00003536,-0.00004697  
,0.00000019,-0.00003536,-0.00004697,-0.00040792,0.,-0.00022606,0.00000  
019,0.00003536,0.00004697,0.00000019,-0.00003536,0.00004697,0.05582179  
,0.,0.00013788,0.,0.,-0.00122817,0.,0.,-0.00000421,0.,0.,0.00660890,0.  
,0.,0.00253428,0.,0.,0.00660890,0.,0.,0.00253428,0.,0.,0.00010431,0.,0  
.,0.00010431,0.,0.,-0.03357174,0.,0.,-0.00355180,0.,0.,-0.00355180,0.,  
0.,-0.00012170,0.,0.00005111,-0.00000850,-0.00002781,-0.00005111,-0.00  
000850,0.00002781,0.,-0.00012170,0.,0.00005111,-0.00000850,0.00002781,  
-0.00005111,-0.00000850,-0.00002781,0.,0.02355228,0.,0.,0.00005724,0.,  
0.,-0.00021084,0.,0.,0.00077638,0.00285184,0.,0.00091356,-0.00218053,0  
.,-0.01152088,-0.00285183,0.,0.00091356,0.00218053,0.,-0.01152088,-0.0  
0047938,0.,-0.00062367,0.00047938,0.,-0.00062367,0.,0.,-0.32042476,0.0  
0025221,0.,0.00088030,-0.00025221,0.,0.00088030,0.00025404,0.,-0.00011  
527,0.00003589,-0.00002455,-0.00000480,0.00003589,0.00002455,-0.000004  
80,-0.00025404,0.,-0.00011527,-0.00003589,0.00002455,-0.00000480,-0.00  
003589,-0.00002455,-0.00000480,0.,0.,0.34075306\\0.,0.,0.00001730,0.,0  
.,-0.00014208,0.,0.,0.00026082,0.00017741,0.,-0.00009948,-0.00006065,0  
.,-0.00002038,-0.00017741,0.,-0.00009948,0.00006065,0.,-0.00002038,-0.  
00013034,0.,0.00004628,0.00013034,0.,0.00004628,0.,0.,0.00007274,0.000  
04566,0.,0.00002214,-0.00004566,0.,0.00002214,0.00000371,0.,-0.0000455  
0,0.00000430,-0.00000799,0.00000720,0.00000430,0.00000799,0.00000720,-  
0.00000371,0.,-0.00004550,-0.00000430,0.00000799,0.00000720,-0.0000043  
0,-0.00000799,0.00000720,0.,0.,-0.00004372\\@

IF I HAVE SEEN FARTHER, IT IS BY STANDING ON THE  
SHOULDERS OF GIANTS. -- SIR ISAAC NEWTON

Job cpu time: 1 days 18 hours 30 minutes 54.0 seconds.

File lengths (MBytes): RWF= 105 Int= 0 D2E= 0 Chk= 4 Scr= 1

Normal termination of Gaussian 94

Entering Gaussian System, Link 0=g94  
AIX runner 1 4 000047578900  
Initial command:  
/usr/share/apps2/g94-D2/l1.exe /usr/share/scratch10/zav/g94-26120.inp  
-scremdir=/usr/share/scratch10/zav/  
Entering Link 1 = /usr/share/apps2/g94-D2/l1.exe PID= 17676.

Copyright (c) 1988,1990,1992,1993,1995 Gaussian, Inc.  
All Rights Reserved.

This is part of the Gaussian 94(TM) system of programs. It is based on the the Gaussian 92(TM) system (copyright 1992 Gaussian, Inc.), the Gaussian 90(TM) system (copyright 1990 Gaussian, Inc.), the Gaussian 88(TM) system (copyright 1988 Gaussian, Inc.), the Gaussian 86(TM) system (copyright 1986 Carnegie Mellon University), and the Gaussian 82(TM) system (copyright 1983 Carnegie Mellon University). Gaussian is a federally registered trademark of Gaussian, Inc.

This software is provided under written license and may be used, copied, transmitted, or stored only in accord with that written license.

The following legend is applicable only to US Government contracts under DFARS:

#### RESTRICTED RIGHTS LEGEND

Use, duplication or disclosure by the US Government is subject to restrictions as set forth in subparagraph (c)(1)(ii) of the Rights in Technical Data and Computer Software clause at DFARS 252.227-7013.

Gaussian, Inc.  
Carnegie Office Park, Building 6, Pittsburgh, PA 15106 USA

The following legend is applicable only to US Government contracts under FAR:

#### RESTRICTED RIGHTS LEGEND

Use, reproduction and disclosure by the US Government is subject to restrictions as set forth in subparagraph (c) of the Commercial Computer Software - Restricted Rights clause at FAR 52.227-19.

Gaussian, Inc.  
Carnegie Office Park, Building 6, Pittsburgh, PA 15106 USA

Cite this work as:

Gaussian 94, Revision D.2,  
M. J. Frisch, G. W. Trucks, H. B. Schlegel, P. M. W. Gill,  
B. G. Johnson, M. A. Robb, J. R. Cheeseman, T. Keith,  
G. A. Petersson, J. A. Montgomery, K. Raghavachari,  
M. A. Al-Laham, V. G. Zakrzewski, J. V. Ortiz, J. B. Foresman,  
J. Cioslowski, B. B. Stefanov, A. Nanayakkara, M. Challacombe,  
C. Y. Peng, P. Y. Ayala, W. Chen, M. W. Wong, J. L. Andres,

E. S. Replogle, R. Gomperts, R. L. Martin, D. J. Fox,  
J. S. Binkley, D. J. Defrees, J. Baker, J. P. Stewart,  
M. Head-Gordon, C. Gonzalez, and J. A. Pople,  
Gaussian, Inc., Pittsburgh PA, 1995.

\*\*\*\*\*  
Gaussian 94: IBM-RS6000-G94RevD.2 1-Mar-1996  
22-Feb-1999  
\*\*\*\*\*

%CHK=ttertmod

Default route: MaxDisk=600MB

-----  
# BLYP 6-31+G(d) OPT FREQ symm=loose  
-----

1/14=-1,18=20,26=3,38=1/1,3;  
2/9=110,12=2,17=4,18=3/2;  
3/5=1,6=6,7=11,11=2,25=1,30=1/1,2,3;  
4//1;  
5/5=2,38=4,42=42/2;  
6/7=2,8=2,9=2,10=2,28=1/1;  
7//1,2,3,16;  
1/14=-1/3(1);  
99//99;  
2/9=110/2;  
3/5=1,6=6,7=11,11=2,25=1,30=1/1,2,3;  
4/5=5,16=2/1;  
5/5=2,38=4,42=42/2;  
7//1,2,3,16;  
1/14=-1/3(-5);  
2/9=110/2;  
3/5=1,6=6,7=11,11=2,25=1,30=1,39=1/1,3;  
6/7=2,8=2,9=2,10=2,28=1/1;  
99/9=1/99;  
-----

ttert  
-----

Symbolic Z-matrix:

Charge = 0 Multiplicity = 1

C1

|     |   |    |   |    |   |     |   |
|-----|---|----|---|----|---|-----|---|
| N2  | 1 | R1 |   |    |   |     |   |
| C3  | 2 | R2 | 1 | a3 |   |     |   |
| C4  | 3 | R3 | 2 | A1 | 1 | 0.  | 0 |
| C5  | 3 | R3 | 2 | A1 | 1 | -d2 | 0 |
| C6  | 3 | R3 | 2 | A1 | 1 | d2  | 0 |
| H7  | 4 | R4 | 3 | A2 | 2 | d3  | 0 |
| H8  | 4 | R4 | 3 | A4 | 2 | d1  | 0 |
| H9  | 4 | R4 | 3 | A5 | 2 | -d1 | 0 |
| H10 | 5 | R4 | 3 | A2 | 2 | d3  | 0 |
| H11 | 5 | R4 | 3 | A4 | 2 | d1  | 0 |
| H12 | 5 | R4 | 3 | A5 | 2 | -d1 | 0 |
| H13 | 6 | R4 | 3 | A2 | 2 | d3  | 0 |
| H14 | 6 | R4 | 3 | A4 | 2 | d1  | 0 |
| H15 | 6 | R4 | 3 | A5 | 2 | -d1 | 0 |

Variables:

|    |         |
|----|---------|
| R1 | 1.17973 |
| R2 | 1.3891  |
| R3 | 1.5     |

```

R4          1.08
A1          109.5
A2          109.5
d1          40.
a3          179.999
d2          120.
d3          179.999
a4          109.5
a5          109.5

```

GradGradGradGradGradGradGradGradGradGradGradGradGradGradGradGradGrad  
 Berny optimization.  
 Initialization pass.

```

-----
!   Initial Parameters   !
! (Angstroms and Degrees) !
-----

```

| Name | Definition | Value    | Derivative Info. |
|------|------------|----------|------------------|
| R1   | R(2,1)     | 1.1797   | estimate D2E/DX2 |
| R2   | R(3,2)     | 1.3891   | estimate D2E/DX2 |
| R3   | R(4,3)     | 1.5      | estimate D2E/DX2 |
| R4   | R(5,3)     | 1.5      | estimate D2E/DX2 |
| R5   | R(6,3)     | 1.5      | estimate D2E/DX2 |
| R6   | R(7,4)     | 1.08     | estimate D2E/DX2 |
| R7   | R(8,4)     | 1.08     | estimate D2E/DX2 |
| R8   | R(9,4)     | 1.08     | estimate D2E/DX2 |
| R9   | R(10,5)    | 1.08     | estimate D2E/DX2 |
| R10  | R(11,5)    | 1.08     | estimate D2E/DX2 |
| R11  | R(12,5)    | 1.08     | estimate D2E/DX2 |
| R12  | R(13,6)    | 1.08     | estimate D2E/DX2 |
| R13  | R(14,6)    | 1.08     | estimate D2E/DX2 |
| R14  | R(15,6)    | 1.08     | estimate D2E/DX2 |
| A1   | L(1,2,3)   | 180.     | estimate D2E/DX2 |
| A2   | L(1,2,3)   | 179.999  | estimate D2E/DX2 |
| A3   | A(2,3,4)   | 109.5    | estimate D2E/DX2 |
| A4   | A(2,3,5)   | 109.5    | estimate D2E/DX2 |
| A5   | A(4,3,5)   | 109.4424 | estimate D2E/DX2 |
| A6   | A(2,3,6)   | 109.5    | estimate D2E/DX2 |
| A7   | A(4,3,6)   | 109.4424 | estimate D2E/DX2 |
| A8   | A(5,3,6)   | 109.4424 | estimate D2E/DX2 |
| A9   | A(3,4,7)   | 109.5    | estimate D2E/DX2 |
| A10  | A(3,4,8)   | 109.5    | estimate D2E/DX2 |
| A11  | A(7,4,8)   | 124.6979 | estimate D2E/DX2 |
| A12  | A(3,4,9)   | 109.5    | estimate D2E/DX2 |
| A13  | A(7,4,9)   | 124.6993 | estimate D2E/DX2 |
| A14  | A(8,4,9)   | 74.5899  | estimate D2E/DX2 |
| A15  | A(3,5,10)  | 109.5    | estimate D2E/DX2 |
| A16  | A(3,5,11)  | 109.5    | estimate D2E/DX2 |
| A17  | A(10,5,11) | 124.6979 | estimate D2E/DX2 |
| A18  | A(3,5,12)  | 109.5    | estimate D2E/DX2 |
| A19  | A(10,5,12) | 124.6993 | estimate D2E/DX2 |
| A20  | A(11,5,12) | 74.5899  | estimate D2E/DX2 |
| A21  | A(3,6,13)  | 109.5    | estimate D2E/DX2 |
| A22  | A(3,6,14)  | 109.5    | estimate D2E/DX2 |
| A23  | A(13,6,14) | 124.6979 | estimate D2E/DX2 |
| A24  | A(3,6,15)  | 109.5    | estimate D2E/DX2 |

|       |             |           |                  |   |
|-------|-------------|-----------|------------------|---|
| ! A25 | A(13,6,15)  | 124.6993  | estimate D2E/DX2 | ! |
| ! A26 | A(14,6,15)  | 74.5899   | estimate D2E/DX2 | ! |
| ! D1  | D(7,4,3,2)  | 179.999   | estimate D2E/DX2 | ! |
| ! D2  | D(7,4,3,5)  | -59.9658  | estimate D2E/DX2 | ! |
| ! D3  | D(7,4,3,6)  | 59.9638   | estimate D2E/DX2 | ! |
| ! D4  | D(8,4,3,2)  | 40.       | estimate D2E/DX2 | ! |
| ! D5  | D(8,4,3,5)  | 160.0352  | estimate D2E/DX2 | ! |
| ! D6  | D(8,4,3,6)  | -80.0352  | estimate D2E/DX2 | ! |
| ! D7  | D(9,4,3,2)  | -40.      | estimate D2E/DX2 | ! |
| ! D8  | D(9,4,3,5)  | 80.0352   | estimate D2E/DX2 | ! |
| ! D9  | D(9,4,3,6)  | -160.0352 | estimate D2E/DX2 | ! |
| ! D10 | D(10,5,3,2) | 179.999   | estimate D2E/DX2 | ! |
| ! D11 | D(10,5,3,4) | 59.9638   | estimate D2E/DX2 | ! |
| ! D12 | D(10,5,3,6) | -59.9658  | estimate D2E/DX2 | ! |
| ! D13 | D(11,5,3,2) | 40.       | estimate D2E/DX2 | ! |
| ! D14 | D(11,5,3,4) | -80.0352  | estimate D2E/DX2 | ! |
| ! D15 | D(11,5,3,6) | 160.0352  | estimate D2E/DX2 | ! |
| ! D16 | D(12,5,3,2) | -40.      | estimate D2E/DX2 | ! |
| ! D17 | D(12,5,3,4) | -160.0352 | estimate D2E/DX2 | ! |
| ! D18 | D(12,5,3,6) | 80.0352   | estimate D2E/DX2 | ! |
| ! D19 | D(13,6,3,2) | 179.999   | estimate D2E/DX2 | ! |
| ! D20 | D(13,6,3,4) | -59.9658  | estimate D2E/DX2 | ! |
| ! D21 | D(13,6,3,5) | 59.9638   | estimate D2E/DX2 | ! |
| ! D22 | D(14,6,3,2) | 40.       | estimate D2E/DX2 | ! |
| ! D23 | D(14,6,3,4) | 160.0352  | estimate D2E/DX2 | ! |
| ! D24 | D(14,6,3,5) | -80.0352  | estimate D2E/DX2 | ! |
| ! D25 | D(15,6,3,2) | -40.      | estimate D2E/DX2 | ! |
| ! D26 | D(15,6,3,4) | 80.0352   | estimate D2E/DX2 | ! |
| ! D27 | D(15,6,3,5) | -160.0352 | estimate D2E/DX2 | ! |

Trust Radius=3.00D-01 FncErr=1.00D-07 GrdErr=1.00D-06

Number of steps in this run= 77 maximum allowed number of steps= 100.

GradGradGradGradGradGradGradGradGradGradGradGradGradGradGradGradGradGradGradGradGrad

Input orientation:

| Center<br>Number | Atomic<br>Number | Coordinates (Angstroms) |           |          |
|------------------|------------------|-------------------------|-----------|----------|
|                  |                  | X                       | Y         | Z        |
| 1                | 6                | .000000                 | .000000   | .000000  |
| 2                | 7                | .000000                 | .000000   | 1.179730 |
| 3                | 6                | .000024                 | .000000   | 2.568830 |
| 4                | 6                | 1.413995                | .000000   | 3.069516 |
| 5                | 6                | -.706948                | -1.224527 | 3.069553 |
| 6                | 6                | -.706948                | 1.224527  | 3.069553 |
| 7                | 1                | 1.414014                | .000018   | 4.149516 |
| 8                | 1                | 2.014145                | .654392   | 2.454705 |
| 9                | 1                | 2.014145                | -.654392  | 2.454705 |
| 10               | 1                | -.706914                | -1.224536 | 4.149553 |
| 11               | 1                | -.440319                | -2.071477 | 2.454748 |
| 12               | 1                | -1.573759               | -1.417085 | 2.454768 |
| 13               | 1                | -.706945                | 1.224518  | 4.149553 |
| 14               | 1                | -1.573759               | 1.417085  | 2.454768 |
| 15               | 1                | -.440319                | 2.071477  | 2.454748 |

Distance matrix (angstroms):

1 2 3 4 5

|    |   |          |          |          |          |          |
|----|---|----------|----------|----------|----------|----------|
| 1  | C | .000000  |          |          |          |          |
| 2  | N | 1.179730 | .000000  |          |          |          |
| 3  | C | 2.568830 | 1.389100 | .000000  |          |          |
| 4  | C | 3.379543 | 2.360227 | 1.500000 | .000000  |          |
| 5  | C | 3.379556 | 2.360227 | 1.500000 | 2.449054 | .000000  |
| 6  | C | 3.379556 | 2.360227 | 1.500000 | 2.449054 | 2.449054 |
| 7  | H | 4.383824 | 3.289234 | 2.120833 | 1.080000 | 2.676623 |
| 8  | H | 3.242003 | 2.471956 | 2.120833 | 1.080000 | 3.363439 |
| 9  | H | 3.242003 | 2.471956 | 2.120833 | 1.080000 | 2.847356 |
| 10 | H | 4.383834 | 3.289234 | 2.120833 | 2.676607 | 1.080000 |
| 11 | H | 3.242019 | 2.471956 | 2.120833 | 2.847356 | 1.080000 |
| 12 | H | 3.242026 | 2.471956 | 2.120833 | 3.363439 | 1.080000 |
| 13 | H | 4.383834 | 3.289234 | 2.120833 | 2.676623 | 2.676607 |
| 14 | H | 3.242026 | 2.471956 | 2.120833 | 3.363439 | 2.847356 |
| 15 | H | 3.242019 | 2.471956 | 2.120833 | 2.847356 | 3.363439 |
|    |   | 6        | 7        | 8        | 9        | 10       |
| 6  | C | .000000  |          |          |          |          |
| 7  | H | 2.676607 | .000000  |          |          |          |
| 8  | H | 2.847356 | 1.913307 | .000000  |          |          |
| 9  | H | 3.363439 | 1.913320 | 1.308783 | .000000  |          |
| 10 | H | 2.676623 | 2.449054 | 3.715782 | 3.256030 | .000000  |
| 11 | H | 3.363439 | 3.256053 | 3.668072 | 2.834171 | 1.913307 |
| 12 | H | 2.847356 | 3.715796 | 4.142954 | 3.668072 | 1.913320 |
| 13 | H | 1.080000 | 2.449054 | 3.256053 | 3.715796 | 2.449054 |
| 14 | H | 1.080000 | 3.715782 | 3.668072 | 4.142954 | 3.256053 |
| 15 | H | 1.080000 | 3.256030 | 2.834171 | 3.668072 | 3.715796 |
|    |   | 11       | 12       | 13       | 14       | 15       |
| 11 | H | .000000  |          |          |          |          |
| 12 | H | 1.308783 | .000000  |          |          |          |
| 13 | H | 3.715782 | 3.256030 | .000000  |          |          |
| 14 | H | 3.668072 | 2.834171 | 1.913307 | .000000  |          |
| 15 | H | 4.142954 | 3.668072 | 1.913320 | 1.308783 | .000000  |

Stoichiometry C5H9N

Framework group C3V[ C3(CNC),3SGV(CH),X(H6)]

Deg. of freedom 9

Full point group C3V NOp 6

Largest Abelian subgroup CS NOp 2

Largest concise Abelian subgroup CS NOp 2

Standard orientation:

| Center<br>Number | Atomic<br>Number | Coordinates (Angstroms) |           |           |
|------------------|------------------|-------------------------|-----------|-----------|
|                  |                  | X                       | Y         | Z         |
| 1                | 6                | .000000                 | .000000   | 2.306519  |
| 2                | 7                | .000000                 | .000000   | 1.126789  |
| 3                | 6                | .000000                 | .000000   | -.262311  |
| 4                | 6                | .000000                 | 1.413973  | -.762997  |
| 5                | 6                | -1.224536               | -.706986  | -.762997  |
| 6                | 6                | 1.224536                | -.706986  | -.762997  |
| 7                | 1                | .000000                 | 1.413992  | -1.842997 |
| 8                | 1                | .654366                 | 2.014131  | -.148186  |
| 9                | 1                | -.654366                | 2.014131  | -.148186  |
| 10               | 1                | -1.224553               | -.706996  | -1.842997 |
| 11               | 1                | -2.071471               | -.440368  | -.148186  |
| 12               | 1                | -1.417106               | -1.573763 | -.148186  |
| 13               | 1                | 1.224553                | -.706996  | -1.842997 |
| 14               | 1                | 1.417106                | -1.573763 | -.148186  |

```

15          1          2.071471    -.440368    -.148186
-----
Rotational constants (GHZ):      4.8066971      3.0465288      3.0465288
Isotopes: C-12,N-14,C-12,C-12,C-12,C-12,H-1,H-1,H-1,H-1,H-1,H-1,H-1,H-1
Standard basis: 6-31+G(d) (6D, 7F)
There are      85 symmetry adapted basis functions of A' symmetry.
There are      47 symmetry adapted basis functions of A'' symmetry.
Crude estimate of integral set expansion from redundant integrals=1.123.
Integral buffers will be      262144 words long.
Raffenetti 2 integral format.
Two-electron integral symmetry is turned on.
  132 basis functions      228 primitive gaussians
   23 alpha electrons      23 beta electrons
   nuclear repulsion energy      235.8351997636 Hartrees.
One-electron integrals computed using PRISM.
The smallest eigenvalue of the overlap matrix is  2.373D-05
Projected INDO Guess.
Initial guess orbital symmetries:
  Occupied (A1) (A1) (A1) (?A) (?A) (?A) (A1) (A1) (?B) (?B)
           (A1) (A1) (E) (E) (E) (E) (A1) (E) (E) (?C) (A1)
           (?D) (?D)
  Virtual  (?E) (?E) (?F) (?F) (A1) (E) (E) (?G) (A1) (?H)
           (E) (E) (?H) (E) (E) (A1) (A1) (E) (E) (A1) (A1)
           (E) (E) (A1) (A1) (E) (E) (A1) (?A) (?A) (A1)
           (?A) (E) (E) (A1) (E) (E) (A1) (A1) (E) (E) (A1)
           (A1) (E) (E) (A1) (?I) (?I) (?I) (E) (E) (?G)
           (?E) (?E) (?F) (?H) (?E) (?E) (?H) (A1) (E) (E)
           (A1) (?B) (?D) (?B) (?E) (?I) (?E) (?E) (?E) (?E)
           (?I) (?E) (?H) (?E) (?E) (?E) (?E) (?E) (?G) (?H)
           (?C) (?E) (?D) (?F) (?E) (?E) (?E) (?E) (?H) (?E)
           (?F) (?E) (?E) (?E) (?E) (?D) (?C) (?D) (?E) (?C)
           (?B) (?E) (?E) (?E) (?C) (?F) (?C)

Requested convergence on RMS density matrix=1.00D-08 within  64 cycles.
Requested convergence on MAX density matrix=1.00D-06.
Integral accuracy reduced to 1.0D-05 until final iterations.
Initial convergence to 1.0D-05 achieved. Increase integral accuracy.
SCF Done:  E(RB-LYP) = -250.423706447      A.U. after  16 cycles
           Convrg   =   .5424D-08           -V/T =  2.0070
           S**2    =   .0000

```

\*\*\*\*\*

Population analysis using the SCF density.

\*\*\*\*\*

Orbital Symmetries:

```

  Occupied (A1) (A1) (A1) (E) (E) (A1) (A1) (?A) (?B) (?B)
           (A1) (?A) (E) (E) (?C) (?C) (A1) (E) (E) (?D)
           (?D) (?D) (A1)
  Virtual  (A1) (E) (E) (A1) (E) (E) (?A) (E) (E) (?E) (?E)
           (A1) (?F) (?F) (A2) (E) (E) (?B) (A1) (E) (E)
           (A1) (A1) (?G) (?G) (?B) (E) (E) (A1) (E) (E)
           (?H) (?H) (A1) (A1) (E) (E) (?A) (A1) (A1) (E)
           (E) (A1) (E) (E) (?I) (?I) (E) (E) (?D) (?A) (E)
           (E) (A1) (?I) (A1) (E) (E) (E) (A1) (E) (E)
           (?B) (?H) (?H) (?A) (?H) (?H) (A1) (A1) (?F) (?F)

```

(A1) (?I) (A1) (?F) (?D) (?D) (?B) (?D) (?D) (?G)  
 (?I) (?G) (?H) (?G) (A1) (?D) (?F) (?B) (?D) (?F)  
 (?G) (?C) (?D) (?G) (?I) (?B) (?A) (?E) (?E) (A1)  
 (A1) (?H) (?F) (A1) (A1) (?I)

Unable to determine electronic state: an orbital has unidentified symmetry.

|       |                   |    |           |          |          |          |          |
|-------|-------------------|----|-----------|----------|----------|----------|----------|
| Alpha | occ. eigenvalues  | -- | -14.06785 | -9.99850 | -9.96289 | -9.93017 | -9.93017 |
| Alpha | occ. eigenvalues  | -- | -9.93017  | -.88657  | -.76452  | -.65794  | -.65794  |
| Alpha | occ. eigenvalues  | -- | -.60666   | -.50845  | -.41744  | -.41744  | -.40906  |
| Alpha | occ. eigenvalues  | -- | -.40906   | -.38975  | -.30898  | -.30898  | -.27443  |
| Alpha | occ. eigenvalues  | -- | -.27443   | -.27001  | -.25990  |          |          |
| Alpha | virt. eigenvalues | -- | -.01631   | -.01606  | -.01606  | .00866   | .01379   |
| Alpha | virt. eigenvalues | -- | .01379    | .03468   | .05146   | .05146   | .05210   |
| Alpha | virt. eigenvalues | -- | .05210    | .06975   | .07964   | .07964   | .09915   |
| Alpha | virt. eigenvalues | -- | .10117    | .10117   | .10179   | .12951   | .13605   |
| Alpha | virt. eigenvalues | -- | .13605    | .14110   | .17098   | .17275   | .17275   |
| Alpha | virt. eigenvalues | -- | .20324    | .22962   | .22962   | .24055   | .25351   |
| Alpha | virt. eigenvalues | -- | .25351    | .25672   | .25672   | .28162   | .29444   |
| Alpha | virt. eigenvalues | -- | .31247    | .31247   | .32094   | .38227   | .43345   |
| Alpha | virt. eigenvalues | -- | .58445    | .58445   | .59399   | .64299   | .64299   |
| Alpha | virt. eigenvalues | -- | .71716    | .71716   | .74930   | .74930   | .75050   |
| Alpha | virt. eigenvalues | -- | .75765    | .80989   | .80989   | .83362   | .86127   |
| Alpha | virt. eigenvalues | -- | .87616    | .90500   | .90500   | .93920   | .93920   |
| Alpha | virt. eigenvalues | -- | .97670    | 1.03113  | 1.03113  | 1.03683  | 1.08804  |
| Alpha | virt. eigenvalues | -- | 1.08804   | 1.16042  | 1.19565  | 1.19565  | 1.23420  |
| Alpha | virt. eigenvalues | -- | 1.41051   | 1.42124  | 1.42124  | 1.57038  | 1.57038  |
| Alpha | virt. eigenvalues | -- | 1.68599   | 1.69632  | 1.70572  | 1.70572  | 1.87848  |
| Alpha | virt. eigenvalues | -- | 1.87848   | 1.95167  | 1.95167  | 1.95740  | 1.98611  |
| Alpha | virt. eigenvalues | -- | 1.98611   | 2.03368  | 2.09897  | 2.09897  | 2.11113  |
| Alpha | virt. eigenvalues | -- | 2.11214   | 2.11214  | 2.11350  | 2.18741  | 2.35882  |
| Alpha | virt. eigenvalues | -- | 2.35882   | 2.44919  | 2.53541  | 2.62489  | 2.62489  |
| Alpha | virt. eigenvalues | -- | 2.84918   | 2.84918  | 3.30248  | 4.10378  | 4.20723  |
| Alpha | virt. eigenvalues | -- | 4.20723   | 4.23873  | 4.32965  | 4.73336  |          |

Condensed to atoms (all electrons):

|    |   | 1        | 2        | 3        | 4        | 5        | 6        |
|----|---|----------|----------|----------|----------|----------|----------|
| 1  | C | 5.330517 | .857389  | -.290103 | .022276  | .022276  | .022276  |
| 2  | N | .857389  | 6.644324 | -.838295 | .181806  | .181806  | .181806  |
| 3  | C | -.290103 | -.838295 | 9.816887 | -.740316 | -.740316 | -.740316 |
| 4  | C | .022276  | .181806  | -.740316 | 6.041302 | -.057212 | -.057212 |
| 5  | C | .022276  | .181806  | -.740316 | -.057212 | 6.041302 | -.057212 |
| 6  | C | .022276  | .181806  | -.740316 | -.057212 | -.057212 | 6.041302 |
| 7  | H | -.001393 | -.007142 | .069325  | .366044  | -.037320 | -.037320 |
| 8  | H | .001470  | .007048  | -.118866 | .401687  | .050173  | -.024088 |
| 9  | H | .001470  | .007048  | -.118866 | .401687  | -.024088 | .050173  |
| 10 | H | -.001393 | -.007142 | .069325  | -.037320 | .366044  | -.037320 |
| 11 | H | .001470  | .007048  | -.118866 | -.024088 | .401687  | .050173  |
| 12 | H | .001470  | .007048  | -.118866 | .050173  | .401687  | -.024088 |
| 13 | H | -.001393 | -.007142 | .069325  | -.037320 | -.037320 | .366044  |
| 14 | H | .001470  | .007048  | -.118866 | .050173  | -.024088 | .401687  |
| 15 | H | .001470  | .007048  | -.118866 | -.024088 | .050173  | .401687  |
|    |   | 7        | 8        | 9        | 10       | 11       | 12       |
| 1  | C | -.001393 | .001470  | .001470  | -.001393 | .001470  | .001470  |
| 2  | N | -.007142 | .007048  | .007048  | -.007142 | .007048  | .007048  |
| 3  | C | .069325  | -.118866 | -.118866 | .069325  | -.118866 | -.118866 |
| 4  | C | .366044  | .401687  | .401687  | -.037320 | -.024088 | .050173  |
| 5  | C | -.037320 | .050173  | -.024088 | .366044  | .401687  | .401687  |
| 6  | C | -.037320 | -.024088 | .050173  | -.037320 | .050173  | -.024088 |
| 7  | H | .476187  | -.012794 | -.012794 | .002508  | -.000189 | .000058  |

|    |   |          |          |          |          |          |          |
|----|---|----------|----------|----------|----------|----------|----------|
| 8  | H | -.012794 | .578953  | -.084263 | .000058  | .000206  | -.000375 |
| 9  | H | -.012794 | -.084263 | .578953  | -.000189 | .001323  | .000206  |
| 10 | H | .002508  | .000058  | -.000189 | .476187  | -.012794 | -.012794 |
| 11 | H | -.000189 | .000206  | .001323  | -.012794 | .578953  | -.084263 |
| 12 | H | .000058  | -.000375 | .000206  | -.012794 | -.084263 | .578953  |
| 13 | H | .002508  | -.000189 | .000058  | .002508  | .000058  | -.000189 |
| 14 | H | .000058  | .000206  | -.000375 | -.000189 | .000206  | .001323  |
| 15 | H | -.000189 | .001323  | .000206  | .000058  | -.000375 | .000206  |

|    |   |          |          |          |
|----|---|----------|----------|----------|
|    |   | 13       | 14       | 15       |
| 1  | C | -.001393 | .001470  | .001470  |
| 2  | N | -.007142 | .007048  | .007048  |
| 3  | C | .069325  | -.118866 | -.118866 |
| 4  | C | -.037320 | .050173  | -.024088 |
| 5  | C | -.037320 | -.024088 | .050173  |
| 6  | C | .366044  | .401687  | .401687  |
| 7  | H | .002508  | .000058  | -.000189 |
| 8  | H | -.000189 | .000206  | .001323  |
| 9  | H | .000058  | -.000375 | .000206  |
| 10 | H | .002508  | -.000189 | .000058  |
| 11 | H | .000058  | .000206  | -.000375 |
| 12 | H | -.000189 | .001323  | .000206  |
| 13 | H | .476187  | -.012794 | -.012794 |
| 14 | H | -.012794 | .578953  | -.084263 |
| 15 | H | -.012794 | -.084263 | .578953  |

Total atomic charges:

|    |   | 1        |
|----|---|----------|
| 1  | C | .030729  |
| 2  | N | -.229697 |
| 3  | C | .037679  |
| 4  | C | -.537591 |
| 5  | C | -.537591 |
| 6  | C | -.537591 |
| 7  | H | .192451  |
| 8  | H | .199452  |
| 9  | H | .199452  |
| 10 | H | .192451  |
| 11 | H | .199452  |
| 12 | H | .199452  |
| 13 | H | .192451  |
| 14 | H | .199452  |
| 15 | H | .199452  |

Sum of Mulliken charges= .00000

Atomic charges with hydrogens summed into heavy atoms:

|    |   |          |
|----|---|----------|
|    |   | 1        |
| 1  | C | .030729  |
| 2  | N | -.229697 |
| 3  | C | .037679  |
| 4  | C | .053763  |
| 5  | C | .053763  |
| 6  | C | .053763  |
| 7  | H | .000000  |
| 8  | H | .000000  |
| 9  | H | .000000  |
| 10 | H | .000000  |
| 11 | H | .000000  |
| 12 | H | .000000  |
| 13 | H | .000000  |

```

14 H      .000000
15 H      .000000
Sum of Mulliken charges=      .00000
Electronic spatial extent (au): <R**2>=    560.7107
Charge=      .0000 electrons
Dipole moment (Debye):
  X=      .0000   Y=      .0000   Z=    -3.3526   Tot=      3.3526
Quadrupole moment (Debye-Ang):
  XX=   -39.0071   YY=   -39.0071   ZZ=    -47.3429
  XY=      .0000   XZ=      .0000   YZ=      .0000
Octapole moment (Debye-Ang**2):
  XXX=      .0000   YYY=     5.7626   ZZZ=   -45.6789   XYY=      .0000
  XXY=   -5.7626   XXZ=     1.7671   XZZ=      .0000   YZZ=      .0000
  YYZ=     1.7671   XYZ=      .0000
Hexadecapole moment (Debye-Ang**3):
  XXXX= -221.5947   YYYY= -221.5947   ZZZZ=  -478.4505   XXXY=      .0000
  XXXZ=      .0000   YYYY=      .0000   YYYZ=    -0.1229   ZZZX=      .0000
  ZZZY=      .0000   XXYX=   -73.8649   XXZZ= -106.5310   YYZZ= -106.5310
  XXYZ=    0.1229   YYXZ=      .0000   ZZXY=      .0000
N-N= 2.358351997636D+02 E-N=-1.051140032242D+03 KE= 2.486939555028D+02
Symmetry A'   KE= 2.022112177701D+02
Symmetry A''  KE= 4.648273773264D+01
***** Axes restored to original set *****

```

| Center<br>Number | Atomic<br>Number | Forces (Hartrees/Bohr) |             |             |
|------------------|------------------|------------------------|-------------|-------------|
|                  |                  | X                      | Y           | Z           |
| 1                | 6                | .000000000             | .000000000  | -.016177234 |
| 2                | 7                | .000000000             | .000000000  | -.026607545 |
| 3                | 6                | .000000000             | .000000000  | .015650936  |
| 4                | 6                | .019354833             | .000000252  | -.037222922 |
| 5                | 6                | -.009677198            | -.016761903 | -.037222922 |
| 6                | 6                | -.009677635            | .016761651  | -.037222922 |
| 7                | 1                | .019477645             | .000000254  | .007251294  |
| 8                | 1                | -.000044397            | .061229653  | .019508121  |
| 9                | 1                | -.000042802            | -.061229654 | .019508121  |
| 10               | 1                | -.009738603            | -.016868262 | .007251294  |
| 11               | 1                | .053048633             | -.030576378 | .019508121  |
| 12               | 1                | -.053005035            | .030651894  | .019508121  |
| 13               | 1                | -.009739042            | .016868009  | .007251294  |
| 14               | 1                | -.053004236            | -.030653275 | .019508121  |
| 15               | 1                | .053047837             | .030577759  | .019508121  |

```

-----
Cartesian Forces:  Max      .061229654 RMS      .026902622
Internal Forces:  Max      .042784779 RMS      .020035821

```

GradGradGradGradGradGradGradGradGradGradGradGradGradGradGradGradGradGradGradGradGrad  
Berny optimization.

Search for a local minimum.

Step number 1 out of a maximum of 77

All quantities printed in internal units (Hartrees-Bohrs-Radians)

Second derivative matrix not updated -- first step.

```

Eigenvalues ---      .00766      .00766      .00766      .04557      .04557
Eigenvalues ---      .04557      .05182      .06590      .06590      .06590
Eigenvalues ---      .06904      .06904      .16000      .16000      .16000
Eigenvalues ---      .16000      .16000      .16000      .16000      .16000
Eigenvalues ---      .16000      .17707      .17707      .25000      .25000

```

```

Eigenvalues --- .32377 .32377 .32377 .35994 .35994
Eigenvalues --- .35994 .35996 .35996 .35996 .35996
Eigenvalues --- .35996 .35996 .47476 1.157051000.00000
Eigenvalues --- 1000.000001000.000001000.000001000.000001000.00000
Eigenvalues --- 1000.000001000.00000

```

RFO step: Lambda=-1.07939418D-01.

Linear search not attempted -- first point.

Maximum step size ( .300) exceeded in Quadratic search.

-- Step size scaled by .419

Iteration 1 RMS(Cart)= .03409263 RMS(Int)= .00083266

Iteration 2 RMS(Cart)= .00067748 RMS(Int)= .00009549

Iteration 3 RMS(Cart)= .00003461 RMS(Int)= .00008758

Iteration 4 RMS(Cart)= .00000163 RMS(Int)= .00008755

TrRot= .000000 .000000 .000000 .000000 .000000 .000000

| Variable | Old X   | -DE/DX  | Delta X<br>(Linear) | Delta X<br>(Quad) | Delta X<br>(Total) | New X   |
|----------|---------|---------|---------------------|-------------------|--------------------|---------|
| R1       | 2.22937 | .01618  | .00000              | .00536            | .00536             | 2.23473 |
| R2       | 2.62502 | .04278  | .00000              | .03078            | .03078             | 2.65580 |
| R3       | 2.83459 | .03954  | .00000              | .03840            | .03840             | 2.87299 |
| R4       | 2.83459 | .03954  | .00000              | .03840            | .03840             | 2.87299 |
| R5       | 2.83459 | .03954  | .00000              | .03840            | .03840             | 2.87299 |
| R6       | 2.04090 | .00725  | .00000              | .00650            | .00650             | 2.04740 |
| R7       | 2.04090 | .02597  | .00000              | .02327            | .02325             | 2.06415 |
| R8       | 2.04090 | .02597  | .00000              | .02327            | .02325             | 2.06415 |
| R9       | 2.04090 | .00725  | .00000              | .00650            | .00650             | 2.04740 |
| R10      | 2.04090 | .02597  | .00000              | .02327            | .02325             | 2.06415 |
| R11      | 2.04090 | .02597  | .00000              | .02327            | .02325             | 2.06415 |
| R12      | 2.04090 | .00725  | .00000              | .00650            | .00650             | 2.04740 |
| R13      | 2.04090 | .02597  | .00000              | .02327            | .02325             | 2.06415 |
| R14      | 2.04090 | .02597  | .00000              | .02327            | .02325             | 2.06415 |
| A1       | 3.14159 | .00000  | .00000              | .00000            | .00000             | 3.14159 |
| A2       | 3.14158 | .00000  | .00000              | .00000            | .00002             | 3.14159 |
| A3       | 1.91114 | -.00074 | .00000              | -.00193           | -.00195            | 1.90919 |
| A4       | 1.91114 | -.00074 | .00000              | -.00193           | -.00195            | 1.90919 |
| A5       | 1.91013 | .00074  | .00000              | .00194            | .00195             | 1.91208 |
| A6       | 1.91114 | -.00074 | .00000              | -.00193           | -.00195            | 1.90919 |
| A7       | 1.91013 | .00074  | .00000              | .00194            | .00195             | 1.91208 |
| A8       | 1.91013 | .00074  | .00000              | .00194            | .00195             | 1.91208 |
| A9       | 1.91114 | .01376  | .00000              | .01143            | .01118             | 1.92232 |
| A10      | 1.91114 | -.00663 | .00000              | -.00728           | -.00740            | 1.90374 |
| A11      | 2.17639 | -.01922 | .00000              | -.03755           | -.03771            | 2.13868 |
| A12      | 1.91114 | -.00663 | .00000              | -.00728           | -.00740            | 1.90374 |
| A13      | 2.17641 | -.01922 | .00000              | -.03755           | -.03774            | 2.13868 |
| A14      | 1.30184 | .04123  | .00000              | .09472            | .09466             | 1.39650 |
| A15      | 1.91114 | .01376  | .00000              | .01143            | .01118             | 1.92232 |
| A16      | 1.91114 | -.00663 | .00000              | -.00728           | -.00740            | 1.90374 |
| A17      | 2.17639 | -.01922 | .00000              | -.03755           | -.03771            | 2.13868 |
| A18      | 1.91114 | -.00663 | .00000              | -.00728           | -.00740            | 1.90374 |
| A19      | 2.17641 | -.01922 | .00000              | -.03755           | -.03774            | 2.13868 |
| A20      | 1.30184 | .04123  | .00000              | .09472            | .09466             | 1.39650 |
| A21      | 1.91114 | .01376  | .00000              | .01143            | .01118             | 1.92232 |
| A22      | 1.91114 | -.00663 | .00000              | -.00728           | -.00740            | 1.90374 |
| A23      | 2.17639 | -.01922 | .00000              | -.03755           | -.03771            | 2.13868 |

|                                                                                  |          |         |           |            |         |          |
|----------------------------------------------------------------------------------|----------|---------|-----------|------------|---------|----------|
| A24                                                                              | 1.91114  | -.00663 | .00000    | -.00728    | -.00740 | 1.90374  |
| A25                                                                              | 2.17641  | -.01922 | .00000    | -.03755    | -.03774 | 2.13868  |
| A26                                                                              | 1.30184  | .04123  | .00000    | .09472     | .09466  | 1.39650  |
| D1                                                                               | 3.14158  | .00000  | .00000    | .00000     | .00002  | 3.14159  |
| D2                                                                               | -1.04660 | -.00090 | .00000    | -.00237    | -.00237 | -1.04897 |
| D3                                                                               | 1.04657  | .00090  | .00000    | .00237     | .00241  | 1.04897  |
| D4                                                                               | .69813   | .02074  | .00000    | .05001     | .04995  | .74808   |
| D5                                                                               | 2.79314  | .01984  | .00000    | .04764     | .04756  | 2.84070  |
| D6                                                                               | -1.39688 | .02164  | .00000    | .05238     | .05234  | -1.34454 |
| D7                                                                               | -.69813  | -.02074 | .00000    | -.05001    | -.04995 | -.74808  |
| D8                                                                               | 1.39688  | -.02164 | .00000    | -.05238    | -.05234 | 1.34454  |
| D9                                                                               | -2.79314 | -.01984 | .00000    | -.04764    | -.04756 | -2.84070 |
| D10                                                                              | 3.14158  | .00000  | .00000    | .00000     | .00002  | 3.14159  |
| D11                                                                              | 1.04657  | .00090  | .00000    | .00237     | .00241  | 1.04897  |
| D12                                                                              | -1.04660 | -.00090 | .00000    | -.00237    | -.00237 | -1.04897 |
| D13                                                                              | .69813   | .02074  | .00000    | .05001     | .04995  | .74808   |
| D14                                                                              | -1.39688 | .02164  | .00000    | .05238     | .05234  | -1.34454 |
| D15                                                                              | 2.79314  | .01984  | .00000    | .04764     | .04756  | 2.84070  |
| D16                                                                              | -.69813  | -.02074 | .00000    | -.05001    | -.04995 | -.74808  |
| D17                                                                              | -2.79314 | -.01984 | .00000    | -.04764    | -.04756 | -2.84070 |
| D18                                                                              | 1.39688  | -.02164 | .00000    | -.05238    | -.05234 | 1.34454  |
| D19                                                                              | 3.14158  | .00000  | .00000    | .00000     | .00002  | 3.14159  |
| D20                                                                              | -1.04660 | -.00090 | .00000    | -.00237    | -.00237 | -1.04897 |
| D21                                                                              | 1.04657  | .00090  | .00000    | .00237     | .00241  | 1.04897  |
| D22                                                                              | .69813   | .02074  | .00000    | .05001     | .04995  | .74808   |
| D23                                                                              | 2.79314  | .01984  | .00000    | .04764     | .04756  | 2.84070  |
| D24                                                                              | -1.39688 | .02164  | .00000    | .05238     | .05234  | -1.34454 |
| D25                                                                              | -.69813  | -.02074 | .00000    | -.05001    | -.04995 | -.74808  |
| D26                                                                              | 1.39688  | -.02164 | .00000    | -.05238    | -.05234 | 1.34454  |
| D27                                                                              | -2.79314 | -.01984 | .00000    | -.04764    | -.04756 | -2.84070 |
| Item                                                                             | Value    |         | Threshold | Converged? |         |          |
| Maximum Force                                                                    | .042785  |         | .000450   | NO         |         |          |
| RMS Force                                                                        | .020036  |         | .000300   | NO         |         |          |
| Maximum Displacement                                                             | .090426  |         | .001800   | NO         |         |          |
| RMS Displacement                                                                 | .034035  |         | .001200   | NO         |         |          |
| Predicted change in Energy=-4.629237D-03                                         |          |         |           |            |         |          |
| GradGradGradGradGradGradGradGradGradGradGradGradGradGradGradGradGradGradGradGrad |          |         |           |            |         |          |

## Input orientation:

| Center<br>Number | Atomic<br>Number | Coordinates (Angstroms) |           |           |
|------------------|------------------|-------------------------|-----------|-----------|
|                  |                  | X                       | Y         | Z         |
| 1                | 6                | .000000                 | .000000   | -2.334983 |
| 2                | 7                | .000000                 | .000000   | -1.152416 |
| 3                | 6                | .000000                 | .000000   | .252972   |
| 4                | 6                | 1.434104                | .000019   | .757672   |
| 5                | 6                | -.717036                | -1.241980 | .757672   |
| 6                | 6                | -.717068                | 1.241961  | .757672   |
| 7                | 1                | 1.448333                | .000019   | 1.841017  |
| 8                | 1                | 2.022037                | .702243   | .162410   |
| 9                | 1                | 2.022056                | -.702190  | .162410   |
| 10               | 1                | -.724150                | -1.254302 | 1.841017  |
| 11               | 1                | -.402858                | -2.102257 | .162410   |
| 12               | 1                | -1.619143               | -1.400056 | .162410   |
| 13               | 1                | -.724183                | 1.254284  | 1.841017  |
| 14               | 1                | -1.619179               | 1.400014  | .162410   |

|                                              |          |                         |          |           |          |
|----------------------------------------------|----------|-------------------------|----------|-----------|----------|
| 15                                           | 1        | -.402913                | 2.102247 | .162410   |          |
| -----                                        |          |                         |          |           |          |
| Distance matrix (angstroms):                 |          |                         |          |           |          |
|                                              | 1        | 2                       | 3        | 4         | 5        |
| 1 C                                          | .000000  |                         |          |           |          |
| 2 N                                          | 1.182567 | .000000                 |          |           |          |
| 3 C                                          | 2.587955 | 1.405388                | .000000  |           |          |
| 4 C                                          | 3.408983 | 2.388533                | 1.520321 | .000000   |          |
| 5 C                                          | 3.408983 | 2.388533                | 1.520321 | 2.483940  | .000000  |
| 6 C                                          | 3.408983 | 2.388533                | 1.520321 | 2.483940  | 2.483940 |
| 7 H                                          | 4.420027 | 3.325403                | 2.149314 | 1.083438  | 2.721216 |
| 8 H                                          | 3.289187 | 2.512080                | 2.142424 | 1.092301  | 3.411284 |
| 9 H                                          | 3.289187 | 2.512080                | 2.142424 | 1.092301  | 2.854528 |
| 10 H                                         | 4.420027 | 3.325403                | 2.149314 | 2.721216  | 1.083438 |
| 11 H                                         | 3.289187 | 2.512080                | 2.142424 | 2.854528  | 1.092301 |
| 12 H                                         | 3.289187 | 2.512080                | 2.142424 | 3.411284  | 1.092301 |
| 13 H                                         | 4.420027 | 3.325403                | 2.149314 | 2.721216  | 2.721216 |
| 14 H                                         | 3.289187 | 2.512080                | 2.142424 | 3.411284  | 2.854528 |
| 15 H                                         | 3.289187 | 2.512080                | 2.142424 | 2.854528  | 3.411284 |
|                                              | 6        | 7                       | 8        | 9         | 10       |
| 6 C                                          | .000000  |                         |          |           |          |
| 7 H                                          | 2.721216 | .000000                 |          |           |          |
| 8 H                                          | 2.854528 | 1.907872                | .000000  |           |          |
| 9 H                                          | 3.411284 | 1.907872                | 1.404434 | .000000   |          |
| 10 H                                         | 2.721216 | 2.508586                | 3.766608 | 3.265608  | .000000  |
| 11 H                                         | 3.411284 | 3.265608                | 3.707471 | 2.800070  | 1.907872 |
| 12 H                                         | 2.854528 | 3.766608                | 4.204504 | 3.707471  | 1.907872 |
| 13 H                                         | 1.083438 | 2.508586                | 3.265608 | 3.766608  | 2.508586 |
| 14 H                                         | 1.092301 | 3.766608                | 3.707471 | 4.204504  | 3.265608 |
| 15 H                                         | 1.092301 | 3.265608                | 2.800070 | 3.707471  | 3.766608 |
|                                              | 11       | 12                      | 13       | 14        | 15       |
| 11 H                                         | .000000  |                         |          |           |          |
| 12 H                                         | 1.404434 | .000000                 |          |           |          |
| 13 H                                         | 3.766608 | 3.265608                | .000000  |           |          |
| 14 H                                         | 3.707471 | 2.800070                | 1.907872 | .000000   |          |
| 15 H                                         | 4.204504 | 3.707471                | 1.907872 | 1.404434  | .000000  |
| Stoichiometry C5H9N                          |          |                         |          |           |          |
| Framework group C3V[ C3(CNC),3SGV(CH),X(H6)] |          |                         |          |           |          |
| Deg. of freedom 9                            |          |                         |          |           |          |
| Full point group C3V NOp 6                   |          |                         |          |           |          |
| Largest Abelian subgroup CS NOp 2            |          |                         |          |           |          |
| Largest concise Abelian subgroup CS NOp 2    |          |                         |          |           |          |
| Standard orientation:                        |          |                         |          |           |          |
| -----                                        |          |                         |          |           |          |
| Center                                       | Atomic   | Coordinates (Angstroms) |          |           |          |
| Number                                       | Number   | X                       | Y        | Z         |          |
| -----                                        |          |                         |          |           |          |
| 1                                            | 6        | .000000                 | .000000  | 2.325779  |          |
| 2                                            | 7        | .000000                 | .000000  | 1.143212  |          |
| 3                                            | 6        | .000000                 | .000000  | -.262176  |          |
| 4                                            | 6        | .000000                 | 1.434104 | -.766876  |          |
| 5                                            | 6        | -1.241970               | -.717052 | -.766876  |          |
| 6                                            | 6        | 1.241970                | -.717052 | -.766876  |          |
| 7                                            | 1        | .000000                 | 1.448333 | -1.850220 |          |
| 8                                            | 1        | .702217                 | 2.022046 | -.171614  |          |
| 9                                            | 1        | -.702217                | 2.022046 | -.171614  |          |
| 10                                           | 1        | -1.254293               | -.724166 | -1.850220 |          |

|    |   |           |           |           |
|----|---|-----------|-----------|-----------|
| 11 | 1 | -2.102252 | -.402886  | -.171614  |
| 12 | 1 | -1.400035 | -1.619161 | -.171614  |
| 13 | 1 | 1.254293  | -.724166  | -1.850220 |
| 14 | 1 | 1.400035  | -1.619161 | -.171614  |
| 15 | 1 | 2.102252  | -.402886  | -.171614  |

Rotational constants (GHZ): 4.6756447 2.9856920 2.9856920  
 Isotopes: C-12,N-14,C-12,C-12,C-12,C-12,H-1,H-1,H-1,H-1,H-1,H-1,H-1,H-1  
 Standard basis: 6-31+G(d) (6D, 7F)

There are 85 symmetry adapted basis functions of A' symmetry.  
 There are 47 symmetry adapted basis functions of A'' symmetry.  
 Crude estimate of integral set expansion from redundant integrals=1.123.  
 Integral buffers will be 262144 words long.

Raffenetti 2 integral format.

Two-electron integral symmetry is turned on.

132 basis functions 228 primitive gaussians

23 alpha electrons 23 beta electrons

nuclear repulsion energy 233.2441293932 Hartrees.

One-electron integrals computed using PRISM.

The smallest eigenvalue of the overlap matrix is 2.543D-05

Initial guess read from the read-write file:

Initial guess orbital symmetries:

|          |      |      |      |      |      |      |      |      |      |
|----------|------|------|------|------|------|------|------|------|------|
| Occupied | (A1) | (A1) | (A1) | (E)  | (A1) | (A1) | (?A) | (?B) | (?B) |
|          | (A1) | (?A) | (E)  | (E)  | (E)  | (A1) | (E)  | (E)  | (?C) |
|          | (?C) | (A1) |      |      |      |      |      |      |      |
| Virtual  | (A1) | (E)  | (E)  | (A1) | (E)  | (E)  | (?A) | (E)  | (?D) |
|          | (A1) | (A2) | (A2) | (A2) | (E)  | (E)  | (?B) | (A1) | (E)  |
|          | (A1) | (?B) | (?E) | (?E) | (?B) | (E)  | (E)  | (?F) | (E)  |
|          | (?G) | (?G) | (A1) | (A1) | (E)  | (E)  | (?A) | (?A) | (A1) |
|          | (E)  | (A1) | (E)  | (E)  | (?H) | (?H) | (E)  | (E)  | (?C) |
|          | (E)  | (A1) | (?H) | (A1) | (E)  | (E)  | (E)  | (A1) | (E)  |
|          | (?B) | (?G) | (?G) | (?A) | (?G) | (?G) | (A1) | (A1) | (A2) |
|          | (?F) | (?H) | (A1) | (A2) | (?C) | (?C) | (?B) | (?C) | (?C) |
|          | (?H) | (?G) | (?G) | (?E) | (?B) | (?C) | (A2) | (?B) | (?C) |
|          | (?E) | (?C) | (?C) | (?E) | (?H) | (?B) | (?A) | (?D) | (?D) |
|          | (A1) | (?G) | (A2) | (A1) | (A1) | (?H) |      |      |      |

Requested convergence on RMS density matrix=1.00D-08 within 64 cycles.

Requested convergence on MAX density matrix=1.00D-06.

Integral accuracy reduced to 1.0D-05 until final iterations.

Initial convergence to 1.0D-05 achieved. Increase integral accuracy.

SCF Done: E(RB-LYP) = -250.463710690 A.U. after 14 cycles

Conv = .7642D-09 -V/T = 2.0082

S\*\*2 = .0000

\*\*\*\*\* Axes restored to original set \*\*\*\*\*

| Center<br>Number | Atomic<br>Number | Forces (Hartrees/Bohr) |             |             |
|------------------|------------------|------------------------|-------------|-------------|
|                  |                  | X                      | Y           | Z           |
| 1                | 6                | .000000000             | .000000000  | -.010660591 |
| 2                | 7                | .000000000             | .000000000  | -.017592687 |
| 3                | 6                | .000000000             | .000000000  | .017982546  |
| 4                | 6                | .017143458             | .000000223  | -.044579734 |
| 5                | 6                | -.008571536            | -.014846782 | -.044579734 |
| 6                | 6                | -.008571922            | .014846559  | -.044579734 |
| 7                | 1                | .015627376             | .000000204  | .005304382  |
| 8                | 1                | -.003789546            | .044705194  | .021349464  |
| 9                | 1                | -.003788381            | -.044705293 | .021349464  |

|    |   |             |             |            |
|----|---|-------------|-------------|------------|
| 10 | 1 | -.007813512 | -.013533806 | .005304382 |
| 11 | 1 | .040610607  | -.019070754 | .021349464 |
| 12 | 1 | -.036821729 | .025633481  | .021349464 |
| 13 | 1 | -.007813864 | .013533603  | .005304382 |
| 14 | 1 | -.036821061 | -.025634440 | .021349464 |
| 15 | 1 | .040610110  | .019071812  | .021349464 |

-----  
 Cartesian Forces: Max .044705293 RMS .022715446  
 Internal Forces: Max .033020167 RMS .014819565

GradGradGradGradGradGradGradGradGradGradGradGradGradGradGradGradGradGrad  
 Berny optimization.

Search for a local minimum.

Step number 2 out of a maximum of 77

All quantities printed in internal units (Hartrees-Bohrs-Radians)

Update second derivatives using information from points 1 2

Trust test= 8.64D+00 RLast= 3.00D-01 DXMaxT set to 4.24D-01

Maximum step size ( .424) exceeded in linear search.

-- Step size scaled by .360

-- Skip Quadratic or steepest descent search.

Quartic linear search produced a step of 1.41477.

Steepest descent instead of Quadratic search.

Iteration 1 RMS(Cart)= .04463860 RMS(Int)= .00163836

Iteration 2 RMS(Cart)= .00139038 RMS(Int)= .00025750

Iteration 3 RMS(Cart)= .00010511 RMS(Int)= .00022760

Iteration 4 RMS(Cart)= .00000686 RMS(Int)= .00022739

TrRot= .000000 .000000 -.000006 .000000 .000000 .000000

| Variable | Old X   | -DE/DX  | Delta X<br>(Linear) | Delta X<br>(Quad) | Delta X<br>(Total) | New X   |
|----------|---------|---------|---------------------|-------------------|--------------------|---------|
| R1       | 2.23473 | .01066  | .00758              | -.00533           | .00226             | 2.23698 |
| R2       | 2.65580 | .02825  | .04355              | -.01342           | .03013             | 2.68593 |
| R3       | 2.87299 | .02490  | .05433              | -.01506           | .03927             | 2.91226 |
| R4       | 2.87299 | .02490  | .05433              | -.01506           | .03927             | 2.91226 |
| R5       | 2.87299 | .02490  | .05433              | -.01506           | .03927             | 2.91226 |
| R6       | 2.04740 | .00551  | .00919              | -.00046           | .00873             | 2.05614 |
| R7       | 2.06415 | .01507  | .03289              | -.01313           | .01976             | 2.08391 |
| R8       | 2.06415 | .01507  | .03289              | -.01313           | .01976             | 2.08391 |
| R9       | 2.04740 | .00551  | .00919              | -.00046           | .00873             | 2.05614 |
| R10      | 2.06415 | .01507  | .03289              | -.01313           | .01976             | 2.08391 |
| R11      | 2.06415 | .01507  | .03289              | -.01313           | .01976             | 2.08391 |
| R12      | 2.04740 | .00551  | .00919              | -.00046           | .00873             | 2.05614 |
| R13      | 2.06415 | .01507  | .03289              | -.01313           | .01976             | 2.08391 |
| R14      | 2.06415 | .01507  | .03289              | -.01313           | .01976             | 2.08391 |
| A1       | 3.14159 | .00000  | .00000              | .00000            | .00000             | 3.14159 |
| A2       | 3.14159 | .00000  | .00002              | .00000            | .00000             | 3.14159 |
| A3       | 1.90919 | -.00070 | -.00276             | -.00033           | -.00308            | 1.90611 |
| A4       | 1.90919 | -.00070 | -.00276             | -.00033           | -.00308            | 1.90611 |
| A5       | 1.91208 | .00069  | .00275              | .00032            | .00306             | 1.91514 |
| A6       | 1.90919 | -.00070 | -.00276             | -.00033           | -.00308            | 1.90611 |
| A7       | 1.91208 | .00069  | .00275              | .00032            | .00306             | 1.91514 |
| A8       | 1.91208 | .00069  | .00275              | .00032            | .00306             | 1.91514 |
| A9       | 1.92232 | .01072  | .01582              | -.00026           | .01499             | 1.93731 |
| A10      | 1.90374 | -.00416 | -.01046             | .00254            | -.00831            | 1.89543 |
| A11      | 2.13868 | -.01633 | -.05336             | -.00370           | -.05752            | 2.08116 |
| A12      | 1.90374 | -.00416 | -.01046             | .00254            | -.00831            | 1.89543 |
| A13      | 2.13868 | -.01633 | -.05339             | -.00370           | -.05752            | 2.08116 |
| A14      | 1.39650 | .03302  | .13392              | .00343            | .13702             | 1.53352 |

| Input orientation: |        |                         |           |           |
|--------------------|--------|-------------------------|-----------|-----------|
| Center             | Atomic | Coordinates (Angstroms) |           |           |
| Number             | Number | X                       | Y         | Z         |
| 1                  | 6      | .000000                 | .000000   | -2.358937 |
| 2                  | 7      | .000000                 | .000000   | -1.175176 |
| 3                  | 6      | .000000                 | .000000   | .246157   |
| 4                  | 6      | 1.455274                | .000019   | .753275   |
| 5                  | 6      | -.727620                | -1.260313 | .753275   |

|    |   |           |           |          |
|----|---|-----------|-----------|----------|
| 6  | 6 | -.727653  | 1.260294  | .753275  |
| 7  | 1 | 1.489216  | .000019   | 1.840805 |
| 8  | 1 | 2.021710  | .765127   | .196645  |
| 9  | 1 | 2.021730  | -.765075  | .196645  |
| 10 | 1 | -.744591  | -1.289709 | 1.840805 |
| 11 | 1 | -.348236  | -2.133416 | .196645  |
| 12 | 1 | -1.673439 | -1.368333 | .196645  |
| 13 | 1 | -.744625  | 1.289689  | 1.840805 |
| 14 | 1 | -1.673475 | 1.368289  | .196645  |
| 15 | 1 | -.348291  | 2.133407  | .196645  |

## Distance matrix (angstroms):

|      | 1        | 2        | 3        | 4        | 5        |
|------|----------|----------|----------|----------|----------|
| 1 C  | .000000  |          |          |          |          |
| 2 N  | 1.183761 | .000000  |          |          |          |
| 3 C  | 2.605094 | 1.421333 | .000000  |          |          |
| 4 C  | 3.435649 | 2.415936 | 1.541100 | .000000  |          |
| 5 C  | 3.435649 | 2.415936 | 1.541100 | 2.520608 | .000000  |
| 6 C  | 3.435649 | 2.415936 | 1.541100 | 2.520608 | 2.520608 |
| 7 H  | 4.455962 | 3.363615 | 2.181895 | 1.088060 | 2.772278 |
| 8 H  | 3.347197 | 2.560200 | 2.162217 | 1.102759 | 3.459923 |
| 9 H  | 3.347197 | 2.560200 | 2.162217 | 1.102759 | 2.848513 |
| 10 H | 4.455962 | 3.363615 | 2.181895 | 2.772278 | 1.088060 |
| 11 H | 3.347197 | 2.560200 | 2.162217 | 2.848513 | 1.102759 |
| 12 H | 3.347197 | 2.560200 | 2.162217 | 3.459923 | 1.102759 |
| 13 H | 4.455962 | 3.363615 | 2.181895 | 2.772278 | 2.772278 |
| 14 H | 3.347197 | 2.560200 | 2.162217 | 3.459923 | 2.848513 |
| 15 H | 3.347197 | 2.560200 | 2.162217 | 2.848513 | 3.459923 |
|      | 6        | 7        | 8        | 9        | 10       |
| 6 C  | .000000  |          |          |          |          |
| 7 H  | 2.772278 | .000000  |          |          |          |
| 8 H  | 2.848513 | 1.890028 | .000000  |          |          |
| 9 H  | 3.459923 | 1.890028 | 1.530202 | .000000  |          |
| 10 H | 2.772278 | 2.579398 | 3.818120 | 3.260527 | .000000  |
| 11 H | 3.459923 | 3.260527 | 3.744088 | 2.736621 | 1.890028 |
| 12 H | 2.848513 | 3.818120 | 4.266823 | 3.744088 | 1.890028 |
| 13 H | 1.088060 | 2.579398 | 3.260527 | 3.818120 | 2.579398 |
| 14 H | 1.102759 | 3.818120 | 3.744088 | 4.266823 | 3.260527 |
| 15 H | 1.102759 | 3.260527 | 2.736621 | 3.744088 | 3.818120 |
|      | 11       | 12       | 13       | 14       | 15       |
| 11 H | .000000  |          |          |          |          |
| 12 H | 1.530202 | .000000  |          |          |          |
| 13 H | 3.818120 | 3.260527 | .000000  |          |          |
| 14 H | 3.744088 | 2.736621 | 1.890028 | .000000  |          |
| 15 H | 4.266823 | 3.744088 | 1.890028 | 1.530202 | .000000  |

Stoichiometry C5H9N

Framework group C3V[ C3(CNC), 3SGV(CH), X(H6)]

Deg. of freedom 9

Full point group C3V NOp 6

Largest Abelian subgroup CS NOp 2

Largest concise Abelian subgroup CS NOp 2

Standard orientation:

| Center<br>Number | Atomic<br>Number | Coordinates (Angstroms) |         |          |
|------------------|------------------|-------------------------|---------|----------|
|                  |                  | X                       | Y       | Z        |
| 1                | 6                | .000000                 | .000000 | 2.344987 |

|    |   |           |           |           |
|----|---|-----------|-----------|-----------|
| 2  | 7 | .000000   | .000000   | 1.161227  |
| 3  | 6 | .000000   | .000000   | -.260107  |
| 4  | 6 | .000000   | 1.455274  | -.767224  |
| 5  | 6 | -1.260304 | -.727637  | -.767224  |
| 6  | 6 | 1.260304  | -.727637  | -.767224  |
| 7  | 1 | .000000   | 1.489216  | -1.854755 |
| 8  | 1 | .765101   | 2.021720  | -.210594  |
| 9  | 1 | -.765101  | 2.021720  | -.210594  |
| 10 | 1 | -1.289699 | -.744608  | -1.854755 |
| 11 | 1 | -2.133412 | -.348263  | -.210594  |
| 12 | 1 | -1.368311 | -1.673457 | -.210594  |
| 13 | 1 | 1.289699  | -.744608  | -1.854755 |
| 14 | 1 | 1.368311  | -1.673457 | -.210594  |
| 15 | 1 | 2.133412  | -.348263  | -.210594  |

-----  
 Rotational constants (GHZ): 4.5446652 2.9282014 2.9282014  
 Isotopes: C-12,N-14,C-12,C-12,C-12,C-12,H-1,H-1,H-1,H-1,H-1,H-1,H-1,H-1  
 Standard basis: 6-31+G(d) (6D, 7F)  
 There are 85 symmetry adapted basis functions of A' symmetry.  
 There are 47 symmetry adapted basis functions of A'' symmetry.  
 Crude estimate of integral set expansion from redundant integrals=1.123.  
 Integral buffers will be 262144 words long.  
 Raffanetti 2 integral format.

Two-electron integral symmetry is turned on.  
 132 basis functions 228 primitive gaussians  
 23 alpha electrons 23 beta electrons  
 nuclear repulsion energy 230.7401687822 Hartrees.

One-electron integrals computed using PRISM.  
 The smallest eigenvalue of the overlap matrix is 2.672D-05  
 Initial guess read from the read-write file:  
 Initial guess orbital symmetries:

|          |                                                   |
|----------|---------------------------------------------------|
| Occupied | (A1) (A1) (A1) (E) (E) (A1) (A1) (A1) (?A) (?A)   |
|          | (A1) (?A) (E) (E) (E) (E) (A1) (E) (E) (?A) (?B)  |
|          | (?B) (A1)                                         |
| Virtual  | (A1) (E) (E) (A1) (E) (E) (?A) (?C) (?C) (E) (E)  |
|          | (A1) (?D) (?D) (A2) (E) (E) (?A) (A1) (E) (E)     |
|          | (A1) (?A) (?E) (?E) (?A) (E) (E) (?F) (?G) (?G)   |
|          | (E) (E) (A1) (A1) (E) (E) (?A) (A1) (A1) (E) (E)  |
|          | (A1) (E) (E) (?H) (?H) (?A) (E) (E) (?A) (E) (E)  |
|          | (A1) (?H) (A1) (E) (E) (E) (E) (?A) (E) (E) (?A)  |
|          | (E) (E) (?A) (?E) (?G) (A1) (?C) (?G) (A1) (?F)   |
|          | (?H) (A1) (?B) (?E) (?D) (?A) (?A) (?H) (?H) (?H) |
|          | (?F) (?H) (?H) (?D) (?B) (?B) (?B) (?A) (?D) (?H) |
|          | (?B) (?B) (?E) (?H) (?A) (?A) (?C) (?C) (A1) (A1) |
|          | (?C) (?G) (A1) (A1) (?H)                          |

Requested convergence on RMS density matrix=1.00D-08 within 64 cycles.  
 Requested convergence on MAX density matrix=1.00D-06.  
 Integral accuracy reduced to 1.0D-05 until final iterations.  
 Initial convergence to 1.0D-05 achieved. Increase integral accuracy.  
 SCF Done: E(RB-LYP) = -250.503609571 A.U. after 14 cycles  
 Convrg = .1243D-08 -V/T = 2.0094  
 S\*\*2 = .0000

\*\*\*\*\* Axes restored to original set \*\*\*\*\*

| Center | Atomic | Forces (Hartrees/Bohr) |   |   |
|--------|--------|------------------------|---|---|
| Number | Number | X                      | Y | Z |

-----

|    |   |             |             |             |
|----|---|-------------|-------------|-------------|
| 1  | 6 | .000000000  | .000000000  | -.008550057 |
| 2  | 7 | .000000000  | .000000000  | -.006797619 |
| 3  | 6 | .000000000  | .000000000  | .021311244  |
| 4  | 6 | .013101969  | .000000171  | -.044995102 |
| 5  | 6 | -.006550837 | -.011346723 | -.044995102 |
| 6  | 6 | -.006551132 | .011346553  | -.044995102 |
| 7  | 1 | .010353480  | .000000135  | .003164584  |
| 8  | 1 | -.005293697 | .026053384  | .019921331  |
| 9  | 1 | -.005293019 | -.026053521 | .019921331  |
| 10 | 1 | -.005176623 | -.008966445 | .003164584  |
| 11 | 1 | .025209741  | -.008442216 | .019921331  |
| 12 | 1 | -.019916502 | .017610649  | .019921331  |
| 13 | 1 | -.005176857 | .008966310  | .003164584  |
| 14 | 1 | -.019916043 | -.017611168 | .019921331  |
| 15 | 1 | .025209521  | .008442872  | .019921331  |

-----  
 Cartesian Forces: Max .044995102 RMS .017723643  
 Internal Forces: Max .021998147 RMS .009449354

GradGradGradGradGradGradGradGradGradGradGradGradGradGradGradGradGradGradGradGrad  
 Berny optimization.

Search for a local minimum.

Step number 3 out of a maximum of 77

All quantities printed in internal units (Hartrees-Bohrs-Radians)

Update second derivatives using information from points 2 3

Maximum step size (.424) exceeded in linear search.

-- Step size scaled by .429

-- Skip Quadratic or steepest descent search.

Quartic linear search produced a step of .99388.

Steepest descent instead of Quadratic search.

Iteration 1 RMS(Cart)= .04216055 RMS(Int)= .00162080

Iteration 2 RMS(Cart)= .00142126 RMS(Int)= .00032999

Iteration 3 RMS(Cart)= .00010454 RMS(Int)= .00030526

Iteration 4 RMS(Cart)= .00000697 RMS(Int)= .00030510

TrRot= .000000 .000000 .000000 .000000 .000000 .000000

| Variable | Old X   | -DE/DX  | Delta X<br>(Linear) | Delta X<br>(Quad) | Delta X<br>(Total) | New X   |
|----------|---------|---------|---------------------|-------------------|--------------------|---------|
| R1       | 2.23698 | .00855  | .00224              | .00186            | .00410             | 2.24109 |
| R2       | 2.68593 | .01535  | .02995              | -.00686           | .02309             | 2.70902 |
| R3       | 2.91226 | .01150  | .03903              | -.00923           | .02980             | 2.94206 |
| R4       | 2.91226 | .01150  | .03903              | -.00923           | .02980             | 2.94206 |
| R5       | 2.91226 | .01150  | .03903              | -.00923           | .02980             | 2.94206 |
| R6       | 2.05614 | .00349  | .00868              | -.00048           | .00820             | 2.06434 |
| R7       | 2.08391 | .00530  | .01964              | -.00838           | .01126             | 2.09517 |
| R8       | 2.08391 | .00530  | .01964              | -.00838           | .01126             | 2.09517 |
| R9       | 2.05614 | .00349  | .00868              | -.00048           | .00820             | 2.06434 |
| R10      | 2.08391 | .00530  | .01964              | -.00838           | .01126             | 2.09517 |
| R11      | 2.08391 | .00530  | .01964              | -.00838           | .01126             | 2.09517 |
| R12      | 2.05614 | .00349  | .00868              | -.00048           | .00820             | 2.06434 |
| R13      | 2.08391 | .00530  | .01964              | -.00838           | .01126             | 2.09517 |
| R14      | 2.08391 | .00530  | .01964              | -.00838           | .01126             | 2.09517 |
| A1       | 3.14159 | .00000  | .00000              | .00000            | .00000             | 3.14159 |
| A2       | 3.14159 | .00000  | .00000              | .00000            | .00000             | 3.14159 |
| A3       | 1.90611 | -.00066 | -.00306             | -.00033           | -.00338            | 1.90272 |
| A4       | 1.90611 | -.00066 | -.00306             | -.00033           | -.00338            | 1.90272 |
| A5       | 1.91514 | .00066  | .00304              | .00033            | .00334             | 1.91848 |
| A6       | 1.90611 | -.00066 | -.00306             | -.00033           | -.00338            | 1.90272 |

|     |          |         |         |         |         |          |
|-----|----------|---------|---------|---------|---------|----------|
| A7  | 1.91514  | .00066  | .00304  | .00033  | .00334  | 1.91848  |
| A8  | 1.91514  | .00066  | .00304  | .00033  | .00334  | 1.91848  |
| A9  | 1.93731  | .00625  | .01489  | -.00184 | .01237  | 1.94967  |
| A10 | 1.89543  | -.00076 | -.00826 | .00344  | -.00537 | 1.89006  |
| A11 | 2.08116  | -.01222 | -.05717 | -.00215 | -.05988 | 2.02127  |
| A12 | 1.89543  | -.00076 | -.00826 | .00344  | -.00537 | 1.89006  |
| A13 | 2.08116  | -.01222 | -.05717 | -.00215 | -.05988 | 2.02127  |
| A14 | 1.53352  | .02200  | .13618  | .00013  | .13572  | 1.66924  |
| A15 | 1.93731  | .00625  | .01489  | -.00184 | .01237  | 1.94967  |
| A16 | 1.89543  | -.00076 | -.00826 | .00344  | -.00537 | 1.89006  |
| A17 | 2.08116  | -.01222 | -.05717 | -.00215 | -.05988 | 2.02127  |
| A18 | 1.89543  | -.00076 | -.00826 | .00344  | -.00537 | 1.89006  |
| A19 | 2.08116  | -.01222 | -.05717 | -.00215 | -.05988 | 2.02127  |
| A20 | 1.53352  | .02200  | .13618  | .00013  | .13572  | 1.66924  |
| A21 | 1.93731  | .00625  | .01489  | -.00184 | .01237  | 1.94967  |
| A22 | 1.89543  | -.00076 | -.00826 | .00344  | -.00537 | 1.89006  |
| A23 | 2.08116  | -.01222 | -.05717 | -.00215 | -.05988 | 2.02127  |
| A24 | 1.89543  | -.00076 | -.00826 | .00344  | -.00537 | 1.89006  |
| A25 | 2.08116  | -.01222 | -.05717 | -.00215 | -.05988 | 2.02127  |
| A26 | 1.53352  | .02200  | .13618  | .00013  | .13572  | 1.66924  |
| D1  | 3.14159  | .00000  | .00000  | .00000  | .00000  | 3.14159  |
| D2  | -1.05276 | -.00082 | -.00377 | -.00042 | -.00419 | -1.05695 |
| D3  | 1.05276  | .00082  | .00377  | .00042  | .00419  | 1.05695  |
| D4  | .82131   | .01199  | .07278  | .00130  | .07412  | .89544   |
| D5  | 2.91014  | .01118  | .06902  | .00089  | .06993  | 2.98008  |
| D6  | -1.26752 | .01281  | .07655  | .00172  | .07832  | -1.18920 |
| D7  | -.82131  | -.01199 | -.07278 | -.00130 | -.07412 | -.89544  |
| D8  | 1.26752  | -.01281 | -.07655 | -.00172 | -.07832 | 1.18920  |
| D9  | -2.91014 | -.01118 | -.06902 | -.00089 | -.06993 | -2.98008 |
| D10 | 3.14159  | .00000  | .00000  | .00000  | .00000  | 3.14159  |
| D11 | 1.05276  | .00082  | .00377  | .00042  | .00419  | 1.05695  |
| D12 | -1.05276 | -.00082 | -.00377 | -.00042 | -.00419 | -1.05695 |
| D13 | .82131   | .01199  | .07278  | .00130  | .07412  | .89544   |
| D14 | -1.26752 | .01281  | .07655  | .00172  | .07832  | -1.18920 |
| D15 | 2.91014  | .01118  | .06902  | .00089  | .06993  | 2.98008  |
| D16 | -.82131  | -.01199 | -.07278 | -.00130 | -.07412 | -.89544  |
| D17 | -2.91014 | -.01118 | -.06902 | -.00089 | -.06993 | -2.98008 |
| D18 | 1.26752  | -.01281 | -.07655 | -.00172 | -.07832 | 1.18920  |
| D19 | 3.14159  | .00000  | .00000  | .00000  | .00000  | 3.14159  |
| D20 | -1.05276 | -.00082 | -.00377 | -.00042 | -.00419 | -1.05695 |
| D21 | 1.05276  | .00082  | .00377  | .00042  | .00419  | 1.05695  |
| D22 | .82131   | .01199  | .07278  | .00130  | .07412  | .89544   |
| D23 | 2.91014  | .01118  | .06902  | .00089  | .06993  | 2.98008  |
| D24 | -1.26752 | .01281  | .07655  | .00172  | .07832  | -1.18920 |
| D25 | -.82131  | -.01199 | -.07278 | -.00130 | -.07412 | -.89544  |
| D26 | 1.26752  | -.01281 | -.07655 | -.00172 | -.07832 | 1.18920  |
| D27 | -2.91014 | -.01118 | -.06902 | -.00089 | -.06993 | -2.98008 |

| Item                 | Value   | Threshold | Converged? |
|----------------------|---------|-----------|------------|
| Maximum Force        | .021998 | .000450   | NO         |
| RMS Force            | .009449 | .000300   | NO         |
| Maximum Displacement | .106780 | .001800   | NO         |
| RMS Displacement     | .041897 | .001200   | NO         |

Predicted change in Energy=-7.187863D-03

GradGradGradGradGradGradGradGradGradGradGradGradGradGradGradGradGradGrad

Input orientation:

| Center<br>Number | Atomic<br>Number | Coordinates (Angstroms) |           |           |
|------------------|------------------|-------------------------|-----------|-----------|
|                  |                  | X                       | Y         | Z         |
| 1                | 6                | .000000                 | .000000   | -2.377638 |
| 2                | 7                | .000000                 | .000000   | -1.191706 |
| 3                | 6                | .000000                 | .000000   | .241847   |
| 4                | 6                | 1.471890                | .000019   | .749174   |
| 5                | 6                | -.735928                | -1.274703 | .749174   |
| 6                | 6                | -.735961                | 1.274684  | .749174   |
| 7                | 1                | 1.523160                | .000020   | 1.840371  |
| 8                | 1                | 2.015331                | .821633   | .240376   |
| 9                | 1                | 2.015352                | -.821580  | .240376   |
| 10               | 1                | -.761563                | -1.319105 | 1.840371  |
| 11               | 1                | -.296111                | -2.156144 | .240376   |
| 12               | 1                | -1.719185               | -1.334556 | .240376   |
| 13               | 1                | -.761597                | 1.319085  | 1.840371  |
| 14               | 1                | -1.719220               | 1.334511  | .240376   |
| 15               | 1                | -.296167                | 2.156136  | .240376   |

Distance matrix (angstroms):

|      | 1        | 2        | 3        | 4        | 5        |
|------|----------|----------|----------|----------|----------|
| 1 C  | .000000  |          |          |          |          |
| 2 N  | 1.185932 | .000000  |          |          |          |
| 3 C  | 2.619485 | 1.433553 | .000000  |          |          |
| 4 C  | 3.455924 | 2.435872 | 1.556869 | .000000  |          |
| 5 C  | 3.455924 | 2.435872 | 1.556869 | 2.549388 | .000000  |
| 6 C  | 3.455924 | 2.435872 | 1.556869 | 2.549388 | 2.549388 |
| 7 H  | 4.484597 | 3.393155 | 2.208007 | 1.092400 | 2.814091 |
| 8 H  | 3.404502 | 2.605282 | 2.176382 | 1.108716 | 3.496130 |
| 9 H  | 3.404502 | 2.605282 | 2.176382 | 1.108716 | 2.834385 |
| 10 H | 4.484597 | 3.393155 | 2.208007 | 2.814091 | 1.092400 |
| 11 H | 3.404502 | 2.605282 | 2.176382 | 2.834385 | 1.108716 |
| 12 H | 3.404502 | 2.605282 | 2.176382 | 3.496130 | 1.108716 |
| 13 H | 4.484597 | 3.393155 | 2.208007 | 2.814091 | 2.814091 |
| 14 H | 3.404502 | 2.605282 | 2.176382 | 3.496130 | 2.834385 |
| 15 H | 3.404502 | 2.605282 | 2.176382 | 2.834385 | 3.496130 |
|      | 6        | 7        | 8        | 9        | 10       |
| 6 C  | .000000  |          |          |          |          |
| 7 H  | 2.814091 | .000000  |          |          |          |
| 8 H  | 2.834385 | 1.864742 | .000000  |          |          |
| 9 H  | 3.496130 | 1.864742 | 1.643213 | .000000  |          |
| 10 H | 2.814091 | 2.638191 | 3.854073 | 3.243265 | .000000  |
| 11 H | 3.496130 | 3.243265 | 3.769604 | 2.669067 | 1.864742 |
| 12 H | 2.834385 | 3.854073 | 4.312280 | 3.769604 | 1.864742 |
| 13 H | 1.092400 | 2.638191 | 3.243265 | 3.854073 | 2.638191 |
| 14 H | 1.108716 | 3.854073 | 3.769604 | 4.312280 | 3.243265 |
| 15 H | 1.108716 | 3.243265 | 2.669067 | 3.769604 | 3.854073 |
|      | 11       | 12       | 13       | 14       | 15       |
| 11 H | .000000  |          |          |          |          |
| 12 H | 1.643213 | .000000  |          |          |          |
| 13 H | 3.854073 | 3.243265 | .000000  |          |          |
| 14 H | 3.769604 | 2.669067 | 1.864742 | .000000  |          |
| 15 H | 4.312280 | 3.769604 | 1.864742 | 1.643213 | .000000  |

Stoichiometry C5H9N

Framework group C3V[ C3(CNC), 3SGV(CH), X(H6)]

Deg. of freedom 9

Full point group C3V NOp 6

Largest Abelian subgroup CS NOP 2  
 Largest concise Abelian subgroup CS NOP 2

Standard orientation:

| Center<br>Number | Atomic<br>Number | Coordinates (Angstroms) |           |           |
|------------------|------------------|-------------------------|-----------|-----------|
|                  |                  | X                       | Y         | Z         |
| 1                | 6                | .000000                 | .000000   | 2.362243  |
| 2                | 7                | .000000                 | .000000   | 1.176310  |
| 3                | 6                | .000000                 | .000000   | -.257242  |
| 4                | 6                | .000000                 | 1.471890  | -.764569  |
| 5                | 6                | -1.274694               | -.735945  | -.764569  |
| 6                | 6                | 1.274694                | -.735945  | -.764569  |
| 7                | 1                | .000000                 | 1.523160  | -1.855766 |
| 8                | 1                | .821606                 | 2.015341  | -.255772  |
| 9                | 1                | -.821606                | 2.015341  | -.255772  |
| 10               | 1                | -1.319095               | -.761580  | -1.855766 |
| 11               | 1                | -2.156140               | -.296139  | -.255772  |
| 12               | 1                | -1.334534               | -1.719203 | -.255772  |
| 13               | 1                | 1.319095                | -.761580  | -1.855766 |
| 14               | 1                | 1.334534                | -1.719203 | -.255772  |
| 15               | 1                | 2.156140                | -.296139  | -.255772  |

Rotational constants (GHZ): 4.4468315 2.8843982 2.8843982  
 Isotopes: C-12,N-14,C-12,C-12,C-12,H-1,H-1,H-1,H-1,H-1,H-1,H-1,H-1  
 Standard basis: 6-31+G(d) (6D, 7F)

There are 85 symmetry adapted basis functions of A' symmetry.

There are 47 symmetry adapted basis functions of A'' symmetry.

Crude estimate of integral set expansion from redundant integrals=1.123.

Integral buffers will be 262144 words long.

Raffenetti 2 integral format.

Two-electron integral symmetry is turned on.

132 basis functions 228 primitive gaussians

23 alpha electrons 23 beta electrons

nuclear repulsion energy 228.8666497423 Hartrees.

One-electron integrals computed using PRISM.

The smallest eigenvalue of the overlap matrix is 2.751D-05

Initial guess read from the read-write file:

Initial guess orbital symmetries:

Occupied (A1) (A1) (A1) (E) (E) (A1) (A1) (A1) (?A) (?A)  
 (A1) (?A) (E) (E) (E) (E) (A1) (?B) (?B) (?A)  
 (?C) (?C) (A1)  
 Virtual (A1) (E) (E) (A1) (E) (E) (?A) (?D) (?D) (E) (E)  
 (A1) (?E) (?E) (A2) (?A) (E) (E) (A1) (E) (E)  
 (A1) (?A) (?F) (?F) (?A) (?C) (?C) (E) (E) (E)  
 (E) (E) (A1) (A1) (E) (E) (A1) (A1) (A1) (E) (E)  
 (A1) (E) (E) (?A) (?G) (?G) (E) (E) (?A) (E) (E)  
 (A1) (A1) (?G) (E) (E) (E) (E) (?A) (E) (E) (?A)  
 (E) (E) (A1) (A1) (?F) (?F) (?D) (?C) (A1) (?F)  
 (?F) (A1) (E) (?F) (?E) (?A) (?A) (A1) (E) (?G)  
 (?F) (?G) (?G) (?E) (?B) (?B) (?C) (?A) (?E) (A1)  
 (?B) (?C) (?F) (?G) (?A) (?A) (?D) (?D) (A1) (A1)  
 (A1) (?D) (?C) (A1) (?G)

Requested convergence on RMS density matrix=1.00D-08 within 64 cycles.

Requested convergence on MAX density matrix=1.00D-06.

Integral accuracy reduced to 1.0D-05 until final iterations.

Initial convergence to 1.0D-05 achieved. Increase integral accuracy.

SCF Done: E(RB-LYP) = -250.528455256 A.U. after 12 cycles  
 Conv = .8627D-08 -V/T = 2.0102  
 S\*\*2 = .0000

\*\*\*\*\* Axes restored to original set \*\*\*\*\*

| Center<br>Number | Atomic<br>Number | Forces (Hartrees/Bohr) |             |             |
|------------------|------------------|------------------------|-------------|-------------|
|                  |                  | X                      | Y           | Z           |
| 1                | 6                | .000000000             | .000000000  | -.004493326 |
| 2                | 7                | .000000000             | .000000000  | -.002036641 |
| 3                | 6                | .000000000             | .000000000  | .023620505  |
| 4                | 6                | .007906600             | .000000103  | -.038753680 |
| 5                | 6                | -.003953211            | -.006847368 | -.038753680 |
| 6                | 6                | -.003953389            | .006847265  | -.038753680 |
| 7                | 1                | .005314513             | .000000069  | .001723817  |
| 8                | 1                | -.004423382            | .011487495  | .015666508  |
| 9                | 1                | -.004423083            | -.011487610 | .015666508  |
| 10               | 1                | -.002657197            | -.004602538 | .001723817  |
| 11               | 1                | .012160153             | -.001912986 | .015666508  |
| 12               | 1                | -.007737021            | .009574307  | .015666508  |
| 13               | 1                | -.002657316            | .004602469  | .001723817  |
| 14               | 1                | -.007736771            | -.009574508 | .015666508  |
| 15               | 1                | .012160103             | .001913303  | .015666508  |

Cartesian Forces: Max .038753680 RMS .013124031  
 Internal Forces: Max .011879111 RMS .005466971

GradGradGradGradGradGradGradGradGradGradGradGradGradGradGradGrad  
 Berny optimization.

Search for a local minimum.

Step number 4 out of a maximum of 77

All quantities printed in internal units (Hartrees-Bohrs-Radians)

Update second derivatives using information from points 3 4

Maximum step size (.424) exceeded in linear search.

-- Step size scaled by .649

-- Skip Quadratic or steepest descent search.

Quartic linear search produced a step of .99760.

Steepest descent instead of Quadratic search.

Iteration 1 RMS(Cart)= .04041277 RMS(Int)= .00163700

Iteration 2 RMS(Cart)= .00146266 RMS(Int)= .00040073

Iteration 3 RMS(Cart)= .00010302 RMS(Int)= .00037954

Iteration 4 RMS(Cart)= .00000719 RMS(Int)= .00037939

TrRot= .000000 .000000 .000000 .000000 .000000 .000000

| Variable | Old X   | -DE/DX  | Delta X<br>(Linear) | Delta X<br>(Quad) | Delta X<br>(Total) | New X   |
|----------|---------|---------|---------------------|-------------------|--------------------|---------|
| R1       | 2.24109 | .00449  | .00409              | -.00085           | .00324             | 2.24433 |
| R2       | 2.70902 | .00653  | .02304              | -.00339           | .01965             | 2.72867 |
| R3       | 2.94206 | .00228  | .02973              | -.00578           | .02394             | 2.96600 |
| R4       | 2.94206 | .00228  | .02973              | -.00578           | .02394             | 2.96600 |
| R5       | 2.94206 | .00228  | .02973              | -.00578           | .02394             | 2.96600 |
| R6       | 2.06434 | .00197  | .00818              | -.00013           | .00805             | 2.07239 |
| R7       | 2.09517 | -.00084 | .01123              | -.00509           | .00614             | 2.10131 |
| R8       | 2.09517 | -.00084 | .01123              | -.00509           | .00614             | 2.10131 |
| R9       | 2.06434 | .00197  | .00818              | -.00013           | .00805             | 2.07239 |
| R10      | 2.09517 | -.00084 | .01123              | -.00509           | .00614             | 2.10131 |
| R11      | 2.09517 | -.00084 | .01123              | -.00509           | .00614             | 2.10131 |
| R12      | 2.06434 | .00197  | .00818              | -.00013           | .00805             | 2.07239 |
